# Supplementary material for: Exploring the Impact of the Biofloc Rearing System and an Oral WSSV Challenge on the Intestinal Bacteriome of Litopenaeus vannamei
Source: MDPI journal article supplement (doi:10.3390/microorganisms6030083), 2018-08-08
Supplement: s1 [file s1]

**Table S2**

| <b>Sample</b> | <b>Raw PE</b> | <b>Combined</b> | <b>Qualified</b> | <b>Nochimera*</b> | <b>Q30</b> | <b>GC%</b> |
|---------------|---------------|-----------------|------------------|-------------------|------------|------------|
| <b>BFT</b>    | 58,363        | 49,047          | 40,890           | 39,938            | 96.11      | 53.09      |
| <b>CWS</b>    | 69,039        | 60,431          | 54,053           | 47,030            | 97.22      | 53.90      |
| <b>BFT.W</b>  | 75,105        | 66,820          | 58,323           | 50,836            | 96.36      | 53.83      |
| <b>CWS.W</b>  | 73,054        | 63,003          | 54,024           | 47,941            | 96.22      | 53.23      |
| Total         | 275,561       | 239,301         | 207,290          | 185,745           |            |            |
| Mean±SD       | 68,890±6,458  | 59,825±6,625    | 51,823±6,550     | 46,436±4,006      | 96,48±0,44 | 53,51±0,36 |

\*Effective sequences used to downstream analysis.

**Raw PE:** paired-ends reads; **Q30:** paired-ends reads which passed through quality filter;

**SD:** standard deviation.
