# Supplementary material for: Exploring the Impact of the Biofloc Rearing System and an Oral WSSV Challenge on the Intestinal Bacteriome of Litopenaeus vannamei
Source: MDPI journal article supplement (doi:10.3390/microorganisms6030083), 2018-08-08
Supplement: s1 [file s1]

|               | Number of unique OTUs | Abundance of unique OTUs from major phyla (%) |               |                |            |  |  |
|---------------|-----------------------|-----------------------------------------------|---------------|----------------|------------|--|--|
|               |                       | Proteobacteria                                | Bacteroidetes | Actinobacteria | Firmicutes |  |  |
| BFT           | 362                   | 17.1                                          | 3.6           | 8.8            | 37.0       |  |  |
| CWS           | 162                   | 34.0                                          | 8.6           | 6.8            | 9.3        |  |  |
| BFT.W         | 111                   | 31.5                                          | 9.0           | 1.8            | 17.1       |  |  |
| CWS.W         | 121                   | 26.4                                          | 10.7          | 5.8            | 14.9       |  |  |
| BFT.W x CWS.W | 174                   | 27.6                                          | 15.5          | 0.6            | 32.2       |  |  |
| Shared        | 60                    | 46.6                                          | 15.0          | 6.6            | 6.6        |  |  |

  

| BFT      |          |                |                     |                    |                     |                |          |
|----------|----------|----------------|---------------------|--------------------|---------------------|----------------|----------|
| OTUs     | Kingdom  | Phylum         | Class               | Order              | Family              | Genus          | Specie   |
| OTU_304  | Bacteria | Proteobacteria | Alphaproteobacteria | Caulobacterales    | Caulobacteraceae    | Brevundimonas  | diminuta |
| OTU_1163 | Bacteria | Proteobacteria | Alphaproteobacteria | Caulobacterales    | Caulobacteraceae    | Caulobacter    |          |
| OTU_1064 | Bacteria | Proteobacteria | Alphaproteobacteria | RF32               |                     |                |          |
| OTU_548  | Bacteria | Proteobacteria | Alphaproteobacteria | Rhizobiales        | Bradyrhizobiaceae   | Bradyrhizobium |          |
| OTU_1025 | Bacteria | Proteobacteria | Alphaproteobacteria | Rhizobiales        | Hyphomicrobiaceae   | Devosia        |          |
| OTU_226  | Bacteria | Proteobacteria | Alphaproteobacteria | Rhizobiales        | Methylobacteriaceae |                |          |
| OTU_1173 | Bacteria | Proteobacteria | Alphaproteobacteria | Rhizobiales        |                     |                |          |
| OTU_458  | Bacteria | Proteobacteria | Alphaproteobacteria | Rhodobacterales    | Rhodobacteraceae    | Phaeobacter    |          |
| OTU_1085 | Bacteria | Proteobacteria | Alphaproteobacteria | Rhodospirillales   | Acetobacteraceae    | Swaminathania  |          |
| OTU_921  | Bacteria | Proteobacteria | Alphaproteobacteria | Rickettsiales      |                     |                |          |
| OTU_1017 | Bacteria | Proteobacteria | Alphaproteobacteria | Rickettsiales      |                     |                |          |
| OTU_1009 | Bacteria | Proteobacteria | Alphaproteobacteria | Rickettsiales      |                     |                |          |
| OTU_338  | Bacteria | Proteobacteria | Alphaproteobacteria | Rickettsiales      |                     |                |          |
| OTU_1239 | Bacteria | Proteobacteria | Alphaproteobacteria | Rickettsiales      |                     |                |          |
| OTU_1259 | Bacteria | Proteobacteria | Alphaproteobacteria | Rickettsiales      |                     |                |          |
| OTU_1040 | Bacteria | Proteobacteria | Alphaproteobacteria | Rickettsiales      |                     |                |          |
| OTU_1001 | Bacteria | Proteobacteria | Alphaproteobacteria | Rickettsiales      |                     |                |          |
| OTU_713  | Bacteria | Proteobacteria | Alphaproteobacteria | Sphingomonadales   |                     |                |          |
| OTU_802  | Bacteria | Proteobacteria | Alphaproteobacteria |                    |                     |                |          |
| OTU_1130 | Bacteria | Proteobacteria | Alphaproteobacteria |                    |                     |                |          |
| OTU_1022 | Bacteria | Proteobacteria | Alphaproteobacteria |                    |                     |                |          |
| OTU_1072 | Bacteria | Proteobacteria | Betaproteobacteria  | Burkholderiales    | Alcaligenaceae      | Sutterella     |          |
| OTU_1183 | Bacteria | Proteobacteria | Betaproteobacteria  | Burkholderiales    | Oxalobacteraceae    | Ralstonia      |          |
| OTU_903  | Bacteria | Proteobacteria | Betaproteobacteria  | Burkholderiales    | Oxalobacteraceae    |                |          |
| OTU_1121 | Bacteria | Proteobacteria | Deltaproteobacteria | Bdellovibrionales  | Bacteriovoracaceae  |                |          |
| OTU_1200 | Bacteria | Proteobacteria | Deltaproteobacteria | Desulfobacterales  | Desulfobulbaceae    |                |          |
| OTU_355  | Bacteria | Proteobacteria | Deltaproteobacteria | Desulfovibrionales | Desulfovibrionaceae |                |          |
| OTU_1076 | Bacteria | Proteobacteria | Deltaproteobacteria | Myxococcales       | OM27                |                |          |
| OTU_423  | Bacteria | Proteobacteria | Deltaproteobacteria | PB19               |                     |                |          |
| OTU_841  | Bacteria | Proteobacteria | Deltaproteobacteria | Spirobacillales    |                     |                |          |
| OTU_387  | Bacteria | Proteobacteria | Deltaproteobacteria | Spirobacillales    |                     |                |          |
| OTU_607  | Bacteria | Proteobacteria | Deltaproteobacteria | Spirobacillales    |                     |                |          |

|          |          |                |                       |                     |                      |                  |               |
|----------|----------|----------------|-----------------------|---------------------|----------------------|------------------|---------------|
| OTU_898  | Bacteria | Proteobacteria | Deltaproteobacteria   | Syntrophobacterales | Syntrophobacteraceae |                  |               |
| OTU_649  | Bacteria | Proteobacteria | Deltaproteobacteria   |                     |                      |                  |               |
| OTU_1124 | Bacteria | Proteobacteria | Epsilonproteobacteria | Campylobacterales   | Campylobacteraceae   | Arcobacter       |               |
| OTU_910  | Bacteria | Proteobacteria | Epsilonproteobacteria | Campylobacterales   | Campylobacteraceae   | Campylobacter    |               |
| OTU_204  | Bacteria | Proteobacteria | Gammaproteobacteria   | 34P16               |                      |                  |               |
| OTU_733  | Bacteria | Proteobacteria | Gammaproteobacteria   | Aeromonadales       | Succinivibrionaceae  | Succinivibrio    |               |
| OTU_1010 | Bacteria | Proteobacteria | Gammaproteobacteria   | Alteromonadales     | Alteromonadaceae     |                  |               |
| OTU_592  | Bacteria | Proteobacteria | Gammaproteobacteria   | Alteromonadales     | Alteromonadaceae     |                  |               |
| OTU_757  | Bacteria | Proteobacteria | Gammaproteobacteria   | Alteromonadales     | HTCC2188             | HTCC             |               |
| OTU_68   | Bacteria | Proteobacteria | Gammaproteobacteria   | Alteromonadales     | Shewanellaceae       | Shewanella       | algae         |
| OTU_675  | Bacteria | Proteobacteria | Gammaproteobacteria   | Chromatiales        | Halothiobacillaceae  | Halothiobacillus |               |
| OTU_1205 | Bacteria | Proteobacteria | Gammaproteobacteria   | Legionellales       |                      |                  |               |
| OTU_1033 | Bacteria | Proteobacteria | Gammaproteobacteria   | Legionellales       |                      |                  |               |
| OTU_190  | Bacteria | Proteobacteria | Gammaproteobacteria   | Oceanospirillales   | Halomonadaceae       | Halomonas        |               |
| OTU_67   | Bacteria | Proteobacteria | Gammaproteobacteria   | Oceanospirillales   | Halomonadaceae       |                  |               |
| OTU_786  | Bacteria | Proteobacteria | Gammaproteobacteria   | Oceanospirillales   | Oleiphilaceae        |                  |               |
| OTU_590  | Bacteria | Proteobacteria | Gammaproteobacteria   | Pseudomonadales     | Moraxellaceae        | Acinetobacter    | rhizosphaerae |
| OTU_578  | Bacteria | Proteobacteria | Gammaproteobacteria   |                     |                      |                  |               |
| OTU_761  | Bacteria | Proteobacteria |                       |                     |                      |                  |               |
| OTU_814  | Bacteria | Proteobacteria |                       |                     |                      |                  |               |
| OTU_990  | Bacteria | Proteobacteria |                       |                     |                      |                  |               |
| OTU_732  | Bacteria | Proteobacteria |                       |                     |                      |                  |               |
| OTU_746  | Bacteria | Proteobacteria |                       |                     |                      |                  |               |
| OTU_863  | Bacteria | Proteobacteria |                       |                     |                      |                  |               |
| OTU_444  | Bacteria | Proteobacteria |                       |                     |                      |                  |               |
| OTU_1061 | Bacteria | Proteobacteria |                       |                     |                      |                  |               |
| OTU_944  | Bacteria | Proteobacteria |                       |                     |                      |                  |               |
| OTU_725  | Bacteria | Proteobacteria |                       |                     |                      |                  |               |
| OTU_779  | Bacteria | Proteobacteria |                       |                     |                      |                  |               |
| OTU_956  | Bacteria | Proteobacteria |                       |                     |                      |                  |               |
| OTU_73   | Bacteria | Bacteroidetes  | [Saprospirae]         | [Saprospirales]     | Saprospiraceae       |                  |               |
| OTU_758  | Bacteria | Bacteroidetes  | Bacteroidia           | Bacteroidales       | [Paraprevotellaceae] | [Prevotella]     |               |
| OTU_1188 | Bacteria | Bacteroidetes  | Bacteroidia           | Bacteroidales       | [Paraprevotellaceae] | CF231            |               |
| OTU_888  | Bacteria | Bacteroidetes  | Bacteroidia           | Bacteroidales       | Prevotellaceae       | Prevotella       |               |
| OTU_1202 | Bacteria | Bacteroidetes  | Bacteroidia           | Bacteroidales       | Prevotellaceae       | Prevotella       |               |
| OTU_1187 | Bacteria | Bacteroidetes  | Bacteroidia           | Bacteroidales       | Prevotellaceae       | Prevotella       |               |
| OTU_1031 | Bacteria | Bacteroidetes  | Bacteroidia           | Bacteroidales       | Prevotellaceae       | Prevotella       |               |
| OTU_894  | Bacteria | Bacteroidetes  | Bacteroidia           | Bacteroidales       | S24-7                |                  |               |
| OTU_558  | Bacteria | Bacteroidetes  | Bacteroidia           | Bacteroidales       |                      |                  |               |
| OTU_398  | Bacteria | Bacteroidetes  | Flavobacteriia        | Flavobacteriales    | Flavobacteriaceae    | Muricauda        |               |
| OTU_614  | Bacteria | Bacteroidetes  | Flavobacteriia        | Flavobacteriales    |                      |                  |               |
| OTU_312  | Bacteria | Bacteroidetes  | Flavobacteriia        | Flavobacteriales    |                      |                  |               |
| OTU_847  | Bacteria | Bacteroidetes  |                       |                     |                      |                  |               |

|          |          |                |                |                   |                    |                     |             |
|----------|----------|----------------|----------------|-------------------|--------------------|---------------------|-------------|
| OTU_344  | Bacteria | Actinobacteria | Acidimicrobiia | Acidimicrobiales  |                    |                     |             |
| OTU_316  | Bacteria | Actinobacteria | Acidimicrobiia | Acidimicrobiales  |                    |                     |             |
| OTU_74   | Bacteria | Actinobacteria | Acidimicrobiia | Acidimicrobiales  |                    |                     |             |
| OTU_1278 | Bacteria | Actinobacteria | Acidimicrobiia | Acidimicrobiales  |                    |                     |             |
| OTU_309  | Bacteria | Actinobacteria | Acidimicrobiia | Acidimicrobiales  |                    |                     |             |
| OTU_427  | Bacteria | Actinobacteria | Acidimicrobiia | Acidimicrobiales  |                    |                     |             |
| OTU_1005 | Bacteria | Actinobacteria | Acidimicrobiia | Acidimicrobiales  |                    |                     |             |
| OTU_302  | Bacteria | Actinobacteria | Acidimicrobiia | Acidimicrobiales  |                    |                     |             |
| OTU_1237 | Bacteria | Actinobacteria | Actinobacteria | Actinomycetales   | Corynebacteriaceae | Corynebacterium     |             |
| OTU_556  | Bacteria | Actinobacteria | Actinobacteria | Actinomycetales   | Intrasporangiaceae |                     |             |
| OTU_1027 | Bacteria | Actinobacteria | Actinobacteria | Actinomycetales   | Microbacteriaceae  | Candidatus Aquiluna | rubra       |
| OTU_189  | Bacteria | Actinobacteria | Actinobacteria | Actinomycetales   | Pseudonocardiaceae |                     |             |
| OTU_80   | Bacteria | Actinobacteria | Actinobacteria | Bifidobacteriales | Bifidobacteriaceae | Bifidobacterium     |             |
| OTU_411  | Bacteria | Actinobacteria | Actinobacteria | Bifidobacteriales | Bifidobacteriaceae |                     |             |
| OTU_1169 | Bacteria | Actinobacteria | Actinobacteria | Bifidobacteriales | Bifidobacteriaceae |                     |             |
| OTU_102  | Bacteria | Actinobacteria | Actinobacteria | Bifidobacteriales | Bifidobacteriaceae |                     |             |
| OTU_967  | Bacteria | Actinobacteria | Actinobacteria | Bifidobacteriales | Bifidobacteriaceae |                     |             |
| OTU_916  | Bacteria | Actinobacteria | Coriobacteriia | Coriobacteriales  | Coriobacteriaceae  | Adlercreutzia       |             |
| OTU_1251 | Bacteria | Actinobacteria | Coriobacteriia | Coriobacteriales  | Coriobacteriaceae  | Adlercreutzia       |             |
| OTU_855  | Bacteria | Actinobacteria | Coriobacteriia | Coriobacteriales  | Coriobacteriaceae  | Adlercreutzia       |             |
| OTU_996  | Bacteria | Actinobacteria | Coriobacteriia | Coriobacteriales  | Coriobacteriaceae  | Atopobium           |             |
| OTU_1269 | Bacteria | Actinobacteria | Coriobacteriia | Coriobacteriales  | Coriobacteriaceae  | Atopobium           |             |
| OTU_1274 | Bacteria | Actinobacteria | Coriobacteriia | Coriobacteriales  | Coriobacteriaceae  | Collinsella         | aerofaciens |
| OTU_1059 | Bacteria | Actinobacteria | Coriobacteriia | Coriobacteriales  | Coriobacteriaceae  |                     |             |
| OTU_793  | Bacteria | Actinobacteria | Coriobacteriia | Coriobacteriales  | Coriobacteriaceae  |                     |             |
| OTU_1243 | Bacteria | Actinobacteria | Coriobacteriia | Coriobacteriales  | Coriobacteriaceae  |                     |             |
| OTU_473  | Bacteria | Actinobacteria | Coriobacteriia | Coriobacteriales  | Coriobacteriaceae  |                     |             |
| OTU_1161 | Bacteria | Actinobacteria | Coriobacteriia | Coriobacteriales  | Coriobacteriaceae  |                     |             |
| OTU_1074 | Bacteria | Actinobacteria | Coriobacteriia | Coriobacteriales  | Coriobacteriaceae  |                     |             |
| OTU_384  | Bacteria | Actinobacteria | Coriobacteriia | Coriobacteriales  | Coriobacteriaceae  |                     |             |
| OTU_750  | Bacteria | Actinobacteria | Coriobacteriia | Coriobacteriales  | Coriobacteriaceae  |                     |             |
| OTU_373  | Bacteria | Actinobacteria | Coriobacteriia | Coriobacteriales  | Coriobacteriaceae  |                     |             |
| OTU_301  | Bacteria | Firmicutes     | Bacilli        | Bacillales        | Bacillaceae        | Bacillus            | cereus      |
| OTU_510  | Bacteria | Firmicutes     | Bacilli        | Lactobacillales   | Aerococcaceae      | Atopococcus         | tabaci      |
| OTU_1007 | Bacteria | Firmicutes     | Bacilli        | Lactobacillales   | Aerococcaceae      |                     |             |
| OTU_557  | Bacteria | Firmicutes     | Bacilli        | Lactobacillales   | Streptococcaceae   | Lactococcus         |             |
| OTU_563  | Bacteria | Firmicutes     | Clostridia     | Clostridiales     | [Mogibacteriaceae] | Mogibacterium       |             |
| OTU_1290 | Bacteria | Firmicutes     | Clostridia     | Clostridiales     | [Mogibacteriaceae] | Mogibacterium       |             |
| OTU_386  | Bacteria | Firmicutes     | Clostridia     | Clostridiales     | [Mogibacteriaceae] |                     |             |
| OTU_859  | Bacteria | Firmicutes     | Clostridia     | Clostridiales     | [Mogibacteriaceae] |                     |             |
| OTU_920  | Bacteria | Firmicutes     | Clostridia     | Clostridiales     | [Mogibacteriaceae] |                     |             |
| OTU_864  | Bacteria | Firmicutes     | Clostridia     | Clostridiales     | [Mogibacteriaceae] |                     |             |
| OTU_911  | Bacteria | Firmicutes     | Clostridia     | Clostridiales     | [Mogibacteriaceae] |                     |             |

|          |          |            |            |               |                     |                        |             |
|----------|----------|------------|------------|---------------|---------------------|------------------------|-------------|
| OTU_798  | Bacteria | Firmicutes | Clostridia | Clostridiales | [Mogibacteriaceae]  |                        |             |
| OTU_988  | Bacteria | Firmicutes | Clostridia | Clostridiales | [Mogibacteriaceae]  |                        |             |
| OTU_385  | Bacteria | Firmicutes | Clostridia | Clostridiales | [Mogibacteriaceae]  |                        |             |
| OTU_394  | Bacteria | Firmicutes | Clostridia | Clostridiales | Christensenellaceae |                        |             |
| OTU_777  | Bacteria | Firmicutes | Clostridia | Clostridiales | Christensenellaceae |                        |             |
| OTU_602  | Bacteria | Firmicutes | Clostridia | Clostridiales | Christensenellaceae |                        |             |
| OTU_173  | Bacteria | Firmicutes | Clostridia | Clostridiales | Clostridiaceae      | Candidatus Arthromitus |             |
| OTU_849  | Bacteria | Firmicutes | Clostridia | Clostridiales | Clostridiaceae      | Clostridium            |             |
| OTU_654  | Bacteria | Firmicutes | Clostridia | Clostridiales | Clostridiaceae      | Clostridium            |             |
| OTU_45   | Bacteria | Firmicutes | Clostridia | Clostridiales | Clostridiaceae      | Clostridium            | butyricum   |
| OTU_254  | Bacteria | Firmicutes | Clostridia | Clostridiales | Clostridiaceae      | Clostridium            | perfringens |
| OTU_203  | Bacteria | Firmicutes | Clostridia | Clostridiales | Clostridiaceae      | Clostridium            |             |
| OTU_695  | Bacteria | Firmicutes | Clostridia | Clostridiales | Clostridiaceae      |                        |             |
| OTU_773  | Bacteria | Firmicutes | Clostridia | Clostridiales | Dehalobacteriaceae  | Dehalobacterium        |             |
| OTU_1134 | Bacteria | Firmicutes | Clostridia | Clostridiales | Eubacteriaceae      | Anaerofustis           |             |
| OTU_715  | Bacteria | Firmicutes | Clostridia | Clostridiales | Lachnospiraceae     | Butyrivibrio           |             |
| OTU_1083 | Bacteria | Firmicutes | Clostridia | Clostridiales | Lachnospiraceae     | Butyrivibrio           |             |
| OTU_644  | Bacteria | Firmicutes | Clostridia | Clostridiales | Lachnospiraceae     | Coprococcus            | catus       |
| OTU_623  | Bacteria | Firmicutes | Clostridia | Clostridiales | Lachnospiraceae     | Coprococcus            |             |
| OTU_772  | Bacteria | Firmicutes | Clostridia | Clostridiales | Lachnospiraceae     | Coprococcus            |             |
| OTU_1287 | Bacteria | Firmicutes | Clostridia | Clostridiales | Lachnospiraceae     | Coprococcus            |             |
| OTU_539  | Bacteria | Firmicutes | Clostridia | Clostridiales | Lachnospiraceae     | Coprococcus            |             |
| OTU_1189 | Bacteria | Firmicutes | Clostridia | Clostridiales | Lachnospiraceae     | Lachnospira            |             |
| OTU_271  | Bacteria | Firmicutes | Clostridia | Clostridiales | Lachnospiraceae     | Lachnospira            |             |
| OTU_1015 | Bacteria | Firmicutes | Clostridia | Clostridiales | Lachnospiraceae     |                        |             |
| OTU_1289 | Bacteria | Firmicutes | Clostridia | Clostridiales | Lachnospiraceae     |                        |             |
| OTU_928  | Bacteria | Firmicutes | Clostridia | Clostridiales | Lachnospiraceae     |                        |             |
| OTU_1038 | Bacteria | Firmicutes | Clostridia | Clostridiales | Lachnospiraceae     |                        |             |
| OTU_1184 | Bacteria | Firmicutes | Clostridia | Clostridiales | Lachnospiraceae     |                        |             |
| OTU_716  | Bacteria | Firmicutes | Clostridia | Clostridiales | Lachnospiraceae     |                        |             |
| OTU_1240 | Bacteria | Firmicutes | Clostridia | Clostridiales | Lachnospiraceae     |                        |             |
| OTU_1194 | Bacteria | Firmicutes | Clostridia | Clostridiales | Lachnospiraceae     |                        |             |
| OTU_999  | Bacteria | Firmicutes | Clostridia | Clostridiales | Lachnospiraceae     |                        |             |
| OTU_1049 | Bacteria | Firmicutes | Clostridia | Clostridiales | Lachnospiraceae     |                        |             |
| OTU_1177 | Bacteria | Firmicutes | Clostridia | Clostridiales | Lachnospiraceae     |                        |             |
| OTU_1036 | Bacteria | Firmicutes | Clostridia | Clostridiales | Lachnospiraceae     |                        |             |
| OTU_625  | Bacteria | Firmicutes | Clostridia | Clostridiales | Lachnospiraceae     |                        |             |
| OTU_689  | Bacteria | Firmicutes | Clostridia | Clostridiales | Lachnospiraceae     |                        |             |
| OTU_1133 | Bacteria | Firmicutes | Clostridia | Clostridiales | Lachnospiraceae     |                        |             |
| OTU_656  | Bacteria | Firmicutes | Clostridia | Clostridiales | Lachnospiraceae     |                        |             |
| OTU_618  | Bacteria | Firmicutes | Clostridia | Clostridiales | Lachnospiraceae     |                        |             |
| OTU_994  | Bacteria | Firmicutes | Clostridia | Clostridiales | Lachnospiraceae     |                        |             |
| OTU_1135 | Bacteria | Firmicutes | Clostridia | Clostridiales | Lachnospiraceae     |                        |             |

|          |          |            |            |               |                 |              |               |
|----------|----------|------------|------------|---------------|-----------------|--------------|---------------|
| OTU_852  | Bacteria | Firmicutes | Clostridia | Clostridiales | Lachnospiraceae |              |               |
| OTU_1056 | Bacteria | Firmicutes | Clostridia | Clostridiales | Lachnospiraceae |              |               |
| OTU_437  | Bacteria | Firmicutes | Clostridia | Clostridiales | Lachnospiraceae |              |               |
| OTU_1066 | Bacteria | Firmicutes | Clostridia | Clostridiales | Lachnospiraceae |              |               |
| OTU_1196 | Bacteria | Firmicutes | Clostridia | Clostridiales | Lachnospiraceae |              |               |
| OTU_904  | Bacteria | Firmicutes | Clostridia | Clostridiales | Lachnospiraceae |              |               |
| OTU_564  | Bacteria | Firmicutes | Clostridia | Clostridiales | Lachnospiraceae |              |               |
| OTU_351  | Bacteria | Firmicutes | Clostridia | Clostridiales | Peptococcaceae  | Peptococcus  |               |
| OTU_738  | Bacteria | Firmicutes | Clostridia | Clostridiales | Ruminococcaceae | Butyricoccus | pullicaecorum |
| OTU_909  | Bacteria | Firmicutes | Clostridia | Clostridiales | Ruminococcaceae | Butyricoccus | pullicaecorum |
| OTU_804  | Bacteria | Firmicutes | Clostridia | Clostridiales | Ruminococcaceae | Oscillospira |               |
| OTU_1272 | Bacteria | Firmicutes | Clostridia | Clostridiales | Ruminococcaceae | Oscillospira |               |
| OTU_328  | Bacteria | Firmicutes | Clostridia | Clostridiales | Ruminococcaceae | Oscillospira |               |
| OTU_787  | Bacteria | Firmicutes | Clostridia | Clostridiales | Ruminococcaceae | Ruminococcus |               |
| OTU_1105 | Bacteria | Firmicutes | Clostridia | Clostridiales | Ruminococcaceae | Ruminococcus |               |
| OTU_1127 | Bacteria | Firmicutes | Clostridia | Clostridiales | Ruminococcaceae | Ruminococcus |               |
| OTU_822  | Bacteria | Firmicutes | Clostridia | Clostridiales | Ruminococcaceae | Ruminococcus |               |
| OTU_1143 | Bacteria | Firmicutes | Clostridia | Clostridiales | Ruminococcaceae | Ruminococcus |               |
| OTU_1034 | Bacteria | Firmicutes | Clostridia | Clostridiales | Ruminococcaceae | Ruminococcus |               |
| OTU_726  | Bacteria | Firmicutes | Clostridia | Clostridiales | Ruminococcaceae | Ruminococcus |               |
| OTU_1012 | Bacteria | Firmicutes | Clostridia | Clostridiales | Ruminococcaceae | Ruminococcus |               |
| OTU_363  | Bacteria | Firmicutes | Clostridia | Clostridiales | Ruminococcaceae | Ruminococcus | flavefaciens  |
| OTU_279  | Bacteria | Firmicutes | Clostridia | Clostridiales | Ruminococcaceae | Ruminococcus |               |
| OTU_874  | Bacteria | Firmicutes | Clostridia | Clostridiales | Ruminococcaceae | Ruminococcus |               |
| OTU_826  | Bacteria | Firmicutes | Clostridia | Clostridiales | Ruminococcaceae | Ruminococcus |               |
| OTU_1125 | Bacteria | Firmicutes | Clostridia | Clostridiales | Ruminococcaceae | Ruminococcus |               |
| OTU_850  | Bacteria | Firmicutes | Clostridia | Clostridiales | Ruminococcaceae | Ruminococcus |               |
| OTU_781  | Bacteria | Firmicutes | Clostridia | Clostridiales | Ruminococcaceae | Ruminococcus |               |
| OTU_482  | Bacteria | Firmicutes | Clostridia | Clostridiales | Ruminococcaceae | Ruminococcus |               |
| OTU_1024 | Bacteria | Firmicutes | Clostridia | Clostridiales | Ruminococcaceae | Ruminococcus |               |
| OTU_1241 | Bacteria | Firmicutes | Clostridia | Clostridiales | Ruminococcaceae |              |               |
| OTU_340  | Bacteria | Firmicutes | Clostridia | Clostridiales | Ruminococcaceae |              |               |
| OTU_1224 | Bacteria | Firmicutes | Clostridia | Clostridiales | Ruminococcaceae |              |               |
| OTU_1048 | Bacteria | Firmicutes | Clostridia | Clostridiales | Ruminococcaceae |              |               |
| OTU_972  | Bacteria | Firmicutes | Clostridia | Clostridiales | Ruminococcaceae |              |               |
| OTU_307  | Bacteria | Firmicutes | Clostridia | Clostridiales | Ruminococcaceae |              |               |
| OTU_1046 | Bacteria | Firmicutes | Clostridia | Clostridiales | Ruminococcaceae |              |               |
| OTU_1197 | Bacteria | Firmicutes | Clostridia | Clostridiales | Ruminococcaceae |              |               |
| OTU_388  | Bacteria | Firmicutes | Clostridia | Clostridiales | Ruminococcaceae |              |               |
| OTU_577  | Bacteria | Firmicutes | Clostridia | Clostridiales | Ruminococcaceae |              |               |
| OTU_1091 | Bacteria | Firmicutes | Clostridia | Clostridiales | Ruminococcaceae |              |               |
| OTU_1128 | Bacteria | Firmicutes | Clostridia | Clostridiales | Ruminococcaceae |              |               |
| OTU_1231 | Bacteria | Firmicutes | Clostridia | Clostridiales | Ruminococcaceae |              |               |

|          |          |               |                 |                    |                     |                       |            |
|----------|----------|---------------|-----------------|--------------------|---------------------|-----------------------|------------|
| OTU_1098 | Bacteria | Firmicutes    | Clostridia      | Clostridiales      | Ruminococcaceae     |                       |            |
| OTU_1221 | Bacteria | Firmicutes    | Clostridia      | Clostridiales      | Ruminococcaceae     |                       |            |
| OTU_1145 | Bacteria | Firmicutes    | Clostridia      | Clostridiales      | Ruminococcaceae     |                       |            |
| OTU_448  | Bacteria | Firmicutes    | Clostridia      | Clostridiales      | Ruminococcaceae     |                       |            |
| OTU_1087 | Bacteria | Firmicutes    | Clostridia      | Clostridiales      | Ruminococcaceae     |                       |            |
| OTU_1101 | Bacteria | Firmicutes    | Clostridia      | Clostridiales      | Ruminococcaceae     |                       |            |
| OTU_937  | Bacteria | Firmicutes    | Clostridia      | Clostridiales      | Veillonellaceae     | Phascolarctobacterium |            |
| OTU_845  | Bacteria | Firmicutes    | Clostridia      | Clostridiales      |                     |                       |            |
| OTU_843  | Bacteria | Firmicutes    | Clostridia      | Clostridiales      |                     |                       |            |
| OTU_331  | Bacteria | Firmicutes    | Clostridia      | Clostridiales      |                     |                       |            |
| OTU_1030 | Bacteria | Firmicutes    | Clostridia      | Clostridiales      |                     |                       |            |
| OTU_867  | Bacteria | Firmicutes    | Clostridia      | Clostridiales      |                     |                       |            |
| OTU_651  | Bacteria | Firmicutes    | Clostridia      | Clostridiales      |                     |                       |            |
| OTU_371  | Bacteria | Firmicutes    | Clostridia      | Clostridiales      |                     |                       |            |
| OTU_1209 | Bacteria | Firmicutes    | Clostridia      | Clostridiales      |                     |                       |            |
| OTU_819  | Bacteria | Firmicutes    | Clostridia      | Clostridiales      |                     |                       |            |
| OTU_472  | Bacteria | Firmicutes    | Clostridia      | Clostridiales      |                     |                       |            |
| OTU_704  | Bacteria | Firmicutes    | Clostridia      | Clostridiales      |                     |                       |            |
| OTU_839  | Bacteria | Firmicutes    | Clostridia      | Clostridiales      |                     |                       |            |
| OTU_986  | Bacteria | Firmicutes    | Clostridia      | Clostridiales      |                     |                       |            |
| OTU_828  | Bacteria | Firmicutes    | Clostridia      | Clostridiales      |                     |                       |            |
| OTU_736  | Bacteria | Firmicutes    | Clostridia      | Clostridiales      |                     |                       |            |
| OTU_766  | Bacteria | Firmicutes    | Clostridia      |                    |                     |                       |            |
| OTU_938  | Bacteria | Firmicutes    | Erysipelotrichi | Erysipelotrichales | Erysipelotrichaceae | [Eubacterium]         | biforme    |
| OTU_730  | Bacteria | Firmicutes    | Erysipelotrichi | Erysipelotrichales | Erysipelotrichaceae | Allobaculum           |            |
| OTU_791  | Bacteria | Firmicutes    | Erysipelotrichi | Erysipelotrichales | Erysipelotrichaceae | Allobaculum           |            |
| OTU_575  | Bacteria | Firmicutes    | Erysipelotrichi | Erysipelotrichales | Erysipelotrichaceae | Allobaculum           |            |
| OTU_945  | Bacteria | Firmicutes    | Erysipelotrichi | Erysipelotrichales | Erysipelotrichaceae | Allobaculum           |            |
| OTU_1097 | Bacteria | Firmicutes    | Erysipelotrichi | Erysipelotrichales | Erysipelotrichaceae | Bulleidia             |            |
| OTU_1110 | Bacteria | Firmicutes    | Erysipelotrichi | Erysipelotrichales | Erysipelotrichaceae | Bulleidia             |            |
| OTU_1050 | Bacteria | Firmicutes    | Erysipelotrichi | Erysipelotrichales | Erysipelotrichaceae | Bulleidia             |            |
| OTU_753  | Bacteria | Firmicutes    | Erysipelotrichi | Erysipelotrichales | Erysipelotrichaceae | Bulleidia             | p-1630-c5  |
| OTU_441  | Bacteria | Firmicutes    | Erysipelotrichi | Erysipelotrichales | Erysipelotrichaceae | Clostridium           | cocleatum  |
| OTU_811  | Bacteria | Firmicutes    | Erysipelotrichi | Erysipelotrichales | Erysipelotrichaceae | L7A_E11               |            |
| OTU_1154 | Bacteria | Firmicutes    | Erysipelotrichi | Erysipelotrichales | Erysipelotrichaceae | p-75-a5               |            |
| OTU_759  | Bacteria | Firmicutes    | Erysipelotrichi | Erysipelotrichales | Erysipelotrichaceae | p-75-a5               |            |
| OTU_1104 | Bacteria | Firmicutes    | Erysipelotrichi | Erysipelotrichales | Erysipelotrichaceae | Sharpea               | azabuensis |
| OTU_1011 | Bacteria | Chloroflexi   | Anaerolineae    | Anaerolineales     | Anaerolinaceae      | SHD-231               |            |
| OTU_881  | Bacteria | Cyanobacteria | Chloroplast     | Chlorophyta        |                     |                       |            |
| OTU_673  | Archaea  | Euryarchaeota | Methanobacteria | Methanobacteriales | Methanobacteriaceae | Methanobrevibacter    |            |
| OTU_939  | Archaea  | Euryarchaeota | Methanobacteria | Methanobacteriales | Methanobacteriaceae | Methanobrevibacter    |            |
| OTU_432  | Bacteria | Fusobacteria  | Fusobacteriia   | Fusobacteriales    | Fusobacteriaceae    | Fusobacterium         |            |
| OTU_784  | Bacteria | Fusobacteria  | Fusobacteriia   | Fusobacteriales    | Leptotrichiaceae    | Leptotrichia          |            |

|          |              |                 |                  |                    |                     |               |        |
|----------|--------------|-----------------|------------------|--------------------|---------------------|---------------|--------|
| OTU_901  | Bacteria     | Planctomycetes  | C6               | d113               |                     |               |        |
| OTU_612  | Bacteria     | Planctomycetes  | Planctomycetia   | Pirellulales       | Pirellulaceae       | planctomycete | MS30D1 |
| OTU_1035 | Bacteria     | Spirochaetes    | Spirochaetes     | Spirochaetales     | Spirochaetaceae     | Treponema     |        |
| OTU_534  | Bacteria     | Tenericutes     | Mollicutes       | Anaeroplasmatales  | Anaeroplasmataceae  | Anaeroplasma  |        |
| OTU_284  | Bacteria     | Tenericutes     | Mollicutes       | Mycoplasmatales    | Mycoplasmataceae    |               |        |
| OTU_418  | Bacteria     | TM7             | TM7-1            |                    |                     |               |        |
| OTU_964  | Bacteria     | TM7             | TM7-3            | CW040              | F16                 |               |        |
| OTU_825  | Bacteria     | TM7             | TM7-3            |                    |                     |               |        |
| OTU_1118 | Bacteria     | Verrucomicrobia | Verrucomicrobiae | Verrucomicrobiales | Verrucomicrobiaceae |               |        |
| OTU_483  | Bacteria     |                 |                  |                    |                     |               |        |
| OTU_763  | Unclassified |                 |                  |                    |                     |               |        |
| OTU_824  | Unclassified |                 |                  |                    |                     |               |        |
| OTU_364  | Unclassified |                 |                  |                    |                     |               |        |
| OTU_1060 | Bacteria     |                 |                  |                    |                     |               |        |
| OTU_1055 | Bacteria     |                 |                  |                    |                     |               |        |
| OTU_325  | Bacteria     |                 |                  |                    |                     |               |        |
| OTU_542  | Bacteria     |                 |                  |                    |                     |               |        |
| OTU_862  | Bacteria     |                 |                  |                    |                     |               |        |
| OTU_424  | Bacteria     |                 |                  |                    |                     |               |        |
| OTU_952  | Bacteria     |                 |                  |                    |                     |               |        |
| OTU_1291 | Bacteria     |                 |                  |                    |                     |               |        |
| OTU_1164 | Bacteria     |                 |                  |                    |                     |               |        |
| OTU_1213 | Bacteria     |                 |                  |                    |                     |               |        |
| OTU_801  | Bacteria     |                 |                  |                    |                     |               |        |
| OTU_1207 | Bacteria     |                 |                  |                    |                     |               |        |
| OTU_541  | Bacteria     |                 |                  |                    |                     |               |        |
| OTU_1226 | Bacteria     |                 |                  |                    |                     |               |        |
| OTU_588  | Bacteria     |                 |                  |                    |                     |               |        |
| OTU_953  | Bacteria     |                 |                  |                    |                     |               |        |
| OTU_536  | Bacteria     |                 |                  |                    |                     |               |        |
| OTU_930  | Bacteria     |                 |                  |                    |                     |               |        |
| OTU_829  | Bacteria     |                 |                  |                    |                     |               |        |
| OTU_681  | Bacteria     |                 |                  |                    |                     |               |        |
| OTU_1280 | Bacteria     |                 |                  |                    |                     |               |        |
| OTU_724  | Unclassified |                 |                  |                    |                     |               |        |
| OTU_599  | Bacteria     |                 |                  |                    |                     |               |        |
| OTU_606  | Bacteria     |                 |                  |                    |                     |               |        |
| OTU_1000 | Bacteria     |                 |                  |                    |                     |               |        |
| OTU_647  | Unclassified |                 |                  |                    |                     |               |        |
| OTU_1080 | Unclassified |                 |                  |                    |                     |               |        |
| OTU_405  | Bacteria     |                 |                  |                    |                     |               |        |
| OTU_322  | Bacteria     |                 |                  |                    |                     |               |        |
| OTU_1267 | Unclassified |                 |                  |                    |                     |               |        |

|          |              |
|----------|--------------|
| OTU_543  | Bacteria     |
| OTU_1065 | Bacteria     |
| OTU_980  | Bacteria     |
| OTU_245  | Bacteria     |
| OTU_992  | Bacteria     |
| OTU_720  | Bacteria     |
| OTU_493  | Bacteria     |
| OTU_333  | Unclassified |
| OTU_1199 | Bacteria     |
| OTU_1142 | Bacteria     |
| OTU_183  | Unclassified |
| OTU_984  | Bacteria     |
| OTU_889  | Bacteria     |
| OTU_1090 | Bacteria     |
| OTU_636  | Bacteria     |
| OTU_1045 | Bacteria     |
| OTU_566  | Bacteria     |
| OTU_806  | Bacteria     |
| OTU_692  | Bacteria     |
| OTU_1228 | Bacteria     |
| OTU_922  | Bacteria     |
| OTU_1151 | Bacteria     |
| OTU_1293 | Bacteria     |
| OTU_1122 | Bacteria     |
| OTU_1132 | Bacteria     |
| OTU_718  | Unclassified |
| OTU_367  | Bacteria     |
| OTU_1109 | Bacteria     |
| OTU_1273 | Bacteria     |
| OTU_1185 | Bacteria     |
| OTU_812  | Bacteria     |
| OTU_723  | Bacteria     |
| OTU_1284 | Bacteria     |
| OTU_1215 | Bacteria     |
| OTU_1248 | Bacteria     |
| OTU_1159 | Bacteria     |
| OTU_1053 | Bacteria     |
| OTU_765  | Bacteria     |
| OTU_1265 | Unclassified |
| OTU_1286 | Bacteria     |
| OTU_818  | Bacteria     |
| OTU_961  | Bacteria     |
| OTU_601  | Unclassified |



|          |              |
|----------|--------------|
| OTU_646  | Bacteria     |
| OTU_1211 | Bacteria     |
| OTU_1172 | Bacteria     |
| OTU_982  | Unclassified |
| OTU_830  | Bacteria     |
| OTU_805  | Bacteria     |
| OTU_519  | Bacteria     |
| OTU_435  | Unclassified |
| OTU_831  | Bacteria     |
| OTU_827  | Bacteria     |
| OTU_708  | Bacteria     |
| OTU_857  | Bacteria     |
| OTU_545  | Unclassified |
| OTU_1229 | Bacteria     |
| OTU_109  | Bacteria     |
| OTU_298  | Bacteria     |
| OTU_1233 | Unclassified |
| OTU_709  | Bacteria     |
| OTU_306  | Bacteria     |
| OTU_774  | Bacteria     |
| OTU_1255 | Bacteria     |
| OTU_1220 | Bacteria     |
| OTU_974  | Bacteria     |
| OTU_1260 | Bacteria     |
| OTU_1264 | Bacteria     |
| OTU_1058 | Bacteria     |
| OTU_747  | Bacteria     |
| OTU_323  | Bacteria     |

| CWS      |          |                |                     |                  |                   |                  |        |
|----------|----------|----------------|---------------------|------------------|-------------------|------------------|--------|
| OTUs     | Kingdom  | Phylum         | Class               | Order            | Family            | Genus            | Specie |
| OTU_420  | Bacteria | Proteobacteria | Alphaproteobacteria | Rhodobacterales  | Rhodobacteraceae  | Rubellimicrobium |        |
| OTU_1032 | Bacteria | Proteobacteria | Alphaproteobacteria | Rickettsiales    |                   |                  |        |
| OTU_233  | Bacteria | Proteobacteria | Alphaproteobacteria | Rickettsiales    |                   |                  |        |
| OTU_570  | Bacteria | Proteobacteria | Alphaproteobacteria | Rickettsiales    |                   |                  |        |
| OTU_571  | Bacteria | Proteobacteria | Alphaproteobacteria | Rickettsiales    |                   |                  |        |
| OTU_348  | Bacteria | Proteobacteria | Alphaproteobacteria | Rickettsiales    |                   |                  |        |
| OTU_975  | Bacteria | Proteobacteria | Alphaproteobacteria | Rickettsiales    |                   |                  |        |
| OTU_1258 | Bacteria | Proteobacteria | Alphaproteobacteria | Rickettsiales    |                   |                  |        |
| OTU_91   | Bacteria | Proteobacteria | Alphaproteobacteria | Sphingomonadales | Sphingomonadaceae | Kaistobacter     |        |
| OTU_1166 | Bacteria | Proteobacteria | Alphaproteobacteria | Sphingomonadales | Sphingomonadaceae | Sphingomonas     |        |
| OTU_296  | Bacteria | Proteobacteria | Betaproteobacteria  | Burkholderiales  | Alcaligenaceae    |                  |        |
| OTU_178  | Bacteria | Proteobacteria | Betaproteobacteria  | Burkholderiales  | Comamonadaceae    |                  |        |

|          |          |                |                     |                     |                    |                  |          |
|----------|----------|----------------|---------------------|---------------------|--------------------|------------------|----------|
| OTU_131  | Bacteria | Proteobacteria | Betaproteobacteria  | Burkholderiales     | Comamonadaceae     |                  |          |
| OTU_856  | Bacteria | Proteobacteria | Betaproteobacteria  | Ellin6067           |                    |                  |          |
| OTU_172  | Bacteria | Proteobacteria | Betaproteobacteria  | Ellin6067           |                    |                  |          |
| OTU_218  | Bacteria | Proteobacteria | Betaproteobacteria  | Hydrogenophilales   | Hydrogenophilaceae | Thiobacillus     |          |
| OTU_1193 | Bacteria | Proteobacteria | Betaproteobacteria  | Methylophilales     | Methylophilaceae   | Methyлотenera    | mobilis  |
| OTU_741  | Bacteria | Proteobacteria | Betaproteobacteria  | SC-I-84             |                    |                  |          |
| OTU_1168 | Bacteria | Proteobacteria | Deltaproteobacteria | Bdellovibrionales   | Bacteriovoracaceae | Bacteriovorax    |          |
| OTU_848  | Bacteria | Proteobacteria | Deltaproteobacteria | Bdellovibrionales   | Bacteriovoracaceae |                  |          |
| OTU_194  | Bacteria | Proteobacteria | Deltaproteobacteria | BPC076              |                    |                  |          |
| OTU_365  | Bacteria | Proteobacteria | Deltaproteobacteria | Desulfobacterales   | Desulfobulbaceae   |                  |          |
| OTU_755  | Bacteria | Proteobacteria | Deltaproteobacteria | Desulfuromonadales  | Geobacteraceae     | Geobacter        |          |
| OTU_691  | Bacteria | Proteobacteria | Deltaproteobacteria | Desulfuromonadales  | Geobacteraceae     | Geobacter        |          |
| OTU_719  | Bacteria | Proteobacteria | Deltaproteobacteria | MIZ46               |                    |                  |          |
| OTU_395  | Bacteria | Proteobacteria | Deltaproteobacteria | MIZ46               |                    |                  |          |
| OTU_267  | Bacteria | Proteobacteria | Deltaproteobacteria | Myxococcales        | Cystobacterineae   |                  |          |
| OTU_303  | Bacteria | Proteobacteria | Deltaproteobacteria | Myxococcales        | Cystobacterineae   |                  |          |
| OTU_147  | Bacteria | Proteobacteria | Deltaproteobacteria | Myxococcales        | Myxococcaceae      | Anaeromyxobacter |          |
| OTU_257  | Bacteria | Proteobacteria | Deltaproteobacteria | Myxococcales        |                    |                  |          |
| OTU_594  | Bacteria | Proteobacteria | Deltaproteobacteria | Myxococcales        |                    |                  |          |
| OTU_484  | Bacteria | Proteobacteria | Deltaproteobacteria | Myxococcales        |                    |                  |          |
| OTU_291  | Bacteria | Proteobacteria | Deltaproteobacteria | Myxococcales        |                    |                  |          |
| OTU_479  | Bacteria | Proteobacteria | Deltaproteobacteria | Syntrophobacterales | Syntrophaceae      |                  |          |
| OTU_126  | Bacteria | Proteobacteria | Deltaproteobacteria |                     |                    |                  |          |
| OTU_507  | Bacteria | Proteobacteria | Gammaproteobacteria | Alteromonadales     | [Chromatiaceae]    | Alishewanella    |          |
| OTU_391  | Bacteria | Proteobacteria | Gammaproteobacteria | Alteromonadales     | 125ds10            |                  |          |
| OTU_835  | Bacteria | Proteobacteria | Gammaproteobacteria | Alteromonadales     | Colwelliaceae      | Thalassomonas    |          |
| OTU_752  | Bacteria | Proteobacteria | Gammaproteobacteria | Alteromonadales     | Idiomarinaceae     | Pseudidiomarina  |          |
| OTU_282  | Bacteria | Proteobacteria | Gammaproteobacteria | Chromatiales        | Chromatiaceae      | Thiocapsa        |          |
| OTU_1217 | Bacteria | Proteobacteria | Gammaproteobacteria | Chromatiales        | Chromatiaceae      |                  |          |
| OTU_246  | Bacteria | Proteobacteria | Gammaproteobacteria | Chromatiales        |                    |                  |          |
| OTU_133  | Bacteria | Proteobacteria | Gammaproteobacteria | HOC36               |                    |                  |          |
| OTU_470  | Bacteria | Proteobacteria | Gammaproteobacteria | Methylococcales     | Methylococcaceae   |                  |          |
| OTU_90   | Bacteria | Proteobacteria | Gammaproteobacteria | Methylococcales     |                    |                  |          |
| OTU_1250 | Bacteria | Proteobacteria | Gammaproteobacteria | Oceanospirillales   | Oceanospirillaceae |                  |          |
| OTU_895  | Bacteria | Proteobacteria | Gammaproteobacteria | Pseudomonadales     | Moraxellaceae      | Acinetobacter    |          |
| OTU_86   | Bacteria | Proteobacteria | Gammaproteobacteria | Pseudomonadales     | Pseudomonadaceae   | Pseudomonas      |          |
| OTU_234  | Bacteria | Proteobacteria | Gammaproteobacteria | Pseudomonadales     | Pseudomonadaceae   | Pseudomonas      | stutzeri |
| OTU_214  | Bacteria | Proteobacteria | Gammaproteobacteria | Pseudomonadales     | Pseudomonadaceae   |                  |          |
| OTU_842  | Bacteria | Proteobacteria | Gammaproteobacteria | Thiotrichales       | Thiotrichaceae     | Thiothrix        |          |
| OTU_255  | Bacteria | Proteobacteria | Gammaproteobacteria | Xanthomonadales     | Sinobacteraceae    |                  |          |
| OTU_210  | Bacteria | Proteobacteria | Gammaproteobacteria |                     |                    |                  |          |
| OTU_275  | Bacteria | Proteobacteria | Gammaproteobacteria |                     |                    |                  |          |
| OTU_705  | Bacteria | Proteobacteria | Gammaproteobacteria |                     |                    |                  |          |

|          |          |                 |                  |                    |                     |                 |              |
|----------|----------|-----------------|------------------|--------------------|---------------------|-----------------|--------------|
| OTU_1223 | Bacteria | Bacteroidetes   | [Rhodothermi]    | [Rhodothermales]   | Rhodothermaceae     |                 |              |
| OTU_262  | Bacteria | Bacteroidetes   | Bacteroidia      | Bacteroidales      | Porphyromonadaceae  | Paludibacter    |              |
| OTU_278  | Bacteria | Bacteroidetes   | Bacteroidia      | Bacteroidales      | Porphyromonadaceae  | Parabacteroides | distasonis   |
| OTU_352  | Bacteria | Bacteroidetes   | Bacteroidia      | Bacteroidales      | RF16                |                 |              |
| OTU_390  | Bacteria | Bacteroidetes   | Bacteroidia      | Bacteroidales      | S24-7               |                 |              |
| OTU_421  | Bacteria | Bacteroidetes   | Bacteroidia      | Bacteroidales      | SB-1                |                 |              |
| OTU_235  | Bacteria | Bacteroidetes   | Bacteroidia      | Bacteroidales      |                     |                 |              |
| OTU_426  | Bacteria | Bacteroidetes   | Bacteroidia      | Bacteroidales      |                     |                 |              |
| OTU_221  | Bacteria | Bacteroidetes   | Flavobacteriia   | Flavobacteriales   | Cryomorphaceae      |                 |              |
| OTU_439  | Bacteria | Bacteroidetes   | Flavobacteriia   | Flavobacteriales   | Flavobacteriaceae   | Myroides        | odoratimimus |
| OTU_533  | Bacteria | Bacteroidetes   | Flavobacteriia   | Flavobacteriales   |                     |                 |              |
| OTU_884  | Bacteria | Bacteroidetes   | Sphingobacteriia | Sphingobacteriales | NS11-12             |                 |              |
| OTU_547  | Bacteria | Bacteroidetes   |                  |                    |                     |                 |              |
| OTU_1180 | Bacteria | Bacteroidetes   |                  |                    |                     |                 |              |
| OTU_100  | Bacteria | Actinobacteria  | Acidimicrobiia   | Acidimicrobiales   | EB1017              |                 |              |
| OTU_82   | Bacteria | Actinobacteria  | Acidimicrobiia   | Acidimicrobiales   | koll13              |                 |              |
| OTU_329  | Bacteria | Actinobacteria  | Actinobacteria   | Actinomycetales    | Actinomycetaceae    | Actinomyces     |              |
| OTU_508  | Bacteria | Actinobacteria  | Actinobacteria   | Actinomycetales    | Corynebacteriaceae  | Corynebacterium |              |
| OTU_216  | Bacteria | Actinobacteria  | Actinobacteria   | Actinomycetales    | Geodermatophilaceae |                 |              |
| OTU_341  | Bacteria | Actinobacteria  | OPB41            |                    |                     |                 |              |
| OTU_292  | Bacteria | Actinobacteria  | Thermoleophilia  | Gaiellales         | Gaiellaceae         |                 |              |
| OTU_400  | Bacteria | Actinobacteria  | Thermoleophilia  | Gaiellales         |                     |                 |              |
| OTU_252  | Bacteria | Actinobacteria  | Thermoleophilia  | Gaiellales         |                     |                 |              |
| OTU_790  | Bacteria | Actinobacteria  | Thermoleophilia  | Gaiellales         |                     |                 |              |
| OTU_1071 | Bacteria | Actinobacteria  | Thermoleophilia  |                    |                     |                 |              |
| OTU_171  | Bacteria | Firmicutes      | Bacilli          | Bacillales         | Bacillaceae         |                 |              |
| OTU_281  | Bacteria | Firmicutes      | Bacilli          | Bacillales         | Bacillaceae         |                 |              |
| OTU_518  | Bacteria | Firmicutes      | Bacilli          | Bacillales         | Bacillaceae         |                 |              |
| OTU_336  | Bacteria | Firmicutes      | Bacilli          | Lactobacillales    | Aerococcaceae       | Abiotrophia     |              |
| OTU_134  | Bacteria | Firmicutes      | Bacilli          | Lactobacillales    | Carnobacteriaceae   |                 |              |
| OTU_206  | Bacteria | Firmicutes      | Clostridia       | Clostridiales      | [Mogibacteriaceae]  | Anaerovorax     |              |
| OTU_466  | Bacteria | Firmicutes      | Clostridia       | Clostridiales      | [Tissierellaceae]   | Peptoniphilus   |              |
| OTU_347  | Bacteria | Firmicutes      | Clostridia       | Clostridiales      | [Tissierellaceae]   | Peptoniphilus   |              |
| OTU_927  | Bacteria | Firmicutes      | Clostridia       | Clostridiales      | Christensenellaceae |                 |              |
| OTU_645  | Bacteria | Firmicutes      | Clostridia       | Clostridiales      | Clostridiaceae      | Caloramator     |              |
| OTU_495  | Bacteria | Firmicutes      | Clostridia       | Clostridiales      | Lachnospiraceae     |                 |              |
| OTU_92   | Bacteria | Firmicutes      | Clostridia       | Clostridiales      | Ruminococcaceae     |                 |              |
| OTU_702  | Bacteria | Firmicutes      | Clostridia       | Clostridiales      | Ruminococcaceae     |                 |              |
| OTU_366  | Bacteria | Firmicutes      | Clostridia       | Clostridiales      | Ruminococcaceae     |                 |              |
| OTU_504  | Bacteria | Firmicutes      | Clostridia       | Clostridiales      |                     |                 |              |
| OTU_380  | Bacteria | [Caldithrix]    | KSB1             | WM105              |                     |                 |              |
| OTU_196  | Archaea  | [Parvarchaeota] | [Parvarchaea]    | YLA114             |                     |                 |              |
| OTU_96   | Archaea  | [Parvarchaeota] | [Parvarchaea]    | YLA114             |                     |                 |              |

|          |              |                  |                      |                    |                     |               |
|----------|--------------|------------------|----------------------|--------------------|---------------------|---------------|
| OTU_268  | Archaea      | [Parvarchaeota]  | [Parvarchaea]        | YLA114             |                     |               |
| OTU_650  | Bacteria     | [Thermi]         | Deinococci           | Deinococcales      | Deinococcaceae      | Deinococcus   |
| OTU_174  | Bacteria     | AC1              | SHA-114              |                    |                     |               |
| OTU_969  | Bacteria     | Acidobacteria    | [Chloracidobacteria] | RB41               |                     |               |
| OTU_505  | Bacteria     | Acidobacteria    | Acidobacteria-6      | iii1-15            |                     |               |
| OTU_450  | Bacteria     | Chlamydiae       | Chlamydiia           | Chlamydiales       |                     |               |
| OTU_207  | Bacteria     | Chlorobi         | BSV26                | PK329              |                     |               |
| OTU_1088 | Bacteria     | Chloroflexi      | Anaerolineae         | Caldilineales      | Caldilineaceae      | Caldilinea    |
| OTU_530  | Bacteria     | Chloroflexi      | Anaerolineae         | Caldilineales      | Caldilineaceae      |               |
| OTU_455  | Bacteria     | Chloroflexi      | Anaerolineae         | SHA-20             |                     |               |
| OTU_632  | Bacteria     | Chloroflexi      | Anaerolineae         | SJA-15             |                     |               |
| OTU_529  | Bacteria     | Chloroflexi      | Anaerolineae         | SJA-15             |                     |               |
| OTU_179  | Bacteria     | Chloroflexi      | Anaerolineae         | SJA-15             |                     |               |
| OTU_297  | Bacteria     | Chloroflexi      | Anaerolineae         |                    |                     |               |
| OTU_155  | Bacteria     | Chloroflexi      | Ellin6529            |                    |                     |               |
| OTU_285  | Bacteria     | Chloroflexi      | Ellin6529            |                    |                     |               |
| OTU_108  | Bacteria     | Cyanobacteria    | Chloroplast          | Chlorophyta        | Chlamydomonadaceae  |               |
| OTU_611  | Bacteria     | Cyanobacteria    | Chloroplast          | Chlorophyta        | Trebouxiophyceae    |               |
| OTU_121  | Bacteria     | Cyanobacteria    | Chloroplast          | Chlorophyta        |                     |               |
| OTU_132  | Bacteria     | Cyanobacteria    | Chloroplast          | Stramenopiles      |                     |               |
| OTU_124  | Bacteria     | Cyanobacteria    | Chloroplast          | Stramenopiles      |                     |               |
| OTU_187  | Bacteria     | Cyanobacteria    | Chloroplast          | Stramenopiles      |                     |               |
| OTU_456  | Bacteria     | Cyanobacteria    |                      |                    |                     |               |
| OTU_399  | Archaea      | Euryarchaeota    | Methanomicrobia      | Methanosarcinales  | Methanosaetaceae    | Methanosaeta  |
| OTU_265  | Bacteria     | Gemmatimonadetes | Gemmatimonadetes     | KD8-87             |                     |               |
| OTU_754  | Bacteria     | Gemmatimonadetes | Gemmatimonadetes     |                    |                     |               |
| OTU_266  | Bacteria     | Gemmatimonadetes | Gemmatimonadetes     |                    |                     |               |
| OTU_346  | Bacteria     | LCP-89           | SAW1_B44             |                    |                     |               |
| OTU_354  | Bacteria     | Spirochaetes     | Spirochaetes         | Spirochaetales     | Spirochaetaceae     |               |
| OTU_800  | Bacteria     | TM6              | SJA-4                |                    |                     |               |
| OTU_205  | Bacteria     | Verrucomicrobia  | [Pedosphaerae]       | [Pedosphaerales]   |                     |               |
| OTU_580  | Bacteria     | Verrucomicrobia  | Opitutae             | Opitiales          | Opitutaceae         | Opitutus      |
| OTU_105  | Bacteria     | Verrucomicrobia  | Verrucomicrobiae     | Verrucomicrobiales | Verrucomicrobiaceae | Luteolibacter |
| OTU_99   | Bacteria     | WS3              | PRR-12               | Sediment-1         |                     |               |
| OTU_412  | Bacteria     | WS5              |                      |                    |                     |               |
| OTU_1108 | Bacteria     |                  |                      |                    |                     |               |
| OTU_796  | Bacteria     |                  |                      |                    |                     |               |
| OTU_1299 | Bacteria     |                  |                      |                    |                     |               |
| OTU_934  | Bacteria     |                  |                      |                    |                     |               |
| OTU_622  | Bacteria     |                  |                      |                    |                     |               |
| OTU_1068 | Unclassified |                  |                      |                    |                     |               |
| OTU_523  | Bacteria     |                  |                      |                    |                     |               |
| OTU_1103 | Bacteria     |                  |                      |                    |                     |               |

|          |              |
|----------|--------------|
| OTU_816  | Bacteria     |
| OTU_664  | Bacteria     |
| OTU_1004 | Bacteria     |
| OTU_220  | Bacteria     |
| OTU_288  | Bacteria     |
| OTU_117  | Bacteria     |
| OTU_152  | Bacteria     |
| OTU_970  | Bacteria     |
| OTU_965  | Bacteria     |
| OTU_471  | Bacteria     |
| OTU_1067 | Bacteria     |
| OTU_464  | Bacteria     |
| OTU_659  | Bacteria     |
| OTU_810  | Unclassified |
| OTU_165  | Bacteria     |
| OTU_269  | Bacteria     |
| OTU_506  | Bacteria     |
| OTU_560  | Bacteria     |
| OTU_652  | Bacteria     |
| OTU_591  | Bacteria     |
| OTU_401  | Bacteria     |

**BFT.W**

| OTUs     | Kingdom  | Phylum         | Class               | Order              | Family             | Genus        | Specie |
|----------|----------|----------------|---------------------|--------------------|--------------------|--------------|--------|
| OTU_1181 | Bacteria | Proteobacteria | Alphaproteobacteria | BD7-3              |                    |              |        |
| OTU_684  | Bacteria | Proteobacteria | Alphaproteobacteria | Kiloniellales      | Kiloniellaceae     |              |        |
| OTU_640  | Bacteria | Proteobacteria | Alphaproteobacteria | Rhizobiales        | Hyphomicrobiaceae  |              |        |
| OTU_1099 | Bacteria | Proteobacteria | Alphaproteobacteria | Rhodospirillales   | Rhodospirillaceae  |              |        |
| OTU_1254 | Bacteria | Proteobacteria | Alphaproteobacteria | Rhodospirillales   |                    |              |        |
| OTU_498  | Bacteria | Proteobacteria | Alphaproteobacteria | Rickettsiales      |                    |              |        |
| OTU_1019 | Bacteria | Proteobacteria | Alphaproteobacteria | Rickettsiales      |                    |              |        |
| OTU_1246 | Bacteria | Proteobacteria | Alphaproteobacteria | Rickettsiales      |                    |              |        |
| OTU_1078 | Bacteria | Proteobacteria | Alphaproteobacteria |                    |                    |              |        |
| OTU_792  | Bacteria | Proteobacteria | Alphaproteobacteria |                    |                    |              |        |
| OTU_1276 | Bacteria | Proteobacteria | Betaproteobacteria  | Nitrosomonadales   | Nitrosomonadaceae  |              |        |
| OTU_620  | Bacteria | Proteobacteria | Betaproteobacteria  | SC-I-84            |                    |              |        |
| OTU_851  | Bacteria | Proteobacteria | Betaproteobacteria  |                    |                    |              |        |
| OTU_469  | Bacteria | Proteobacteria | Deltaproteobacteria | Bdellovibrionales  | Bacteriovoracaceae |              |        |
| OTU_517  | Bacteria | Proteobacteria | Deltaproteobacteria | Bdellovibrionales  | Bacteriovoracaceae |              |        |
| OTU_815  | Bacteria | Proteobacteria | Deltaproteobacteria | Bdellovibrionales  | Bdellovibrionaceae | Bdellovibrio |        |
| OTU_1116 | Bacteria | Proteobacteria | Deltaproteobacteria | Desulfuromonadales | Geobacteraceae     | Geobacter    |        |
| OTU_976  | Bacteria | Proteobacteria | Deltaproteobacteria | MIZ46              |                    |              |        |
| OTU_731  | Bacteria | Proteobacteria | Deltaproteobacteria | NB1-j              | JTB38              |              |        |

|          |          |                |                     |                   |                     |                |           |
|----------|----------|----------------|---------------------|-------------------|---------------------|----------------|-----------|
| OTU_1186 | Bacteria | Proteobacteria | Deltaproteobacteria | Spirobacillales   |                     |                |           |
| OTU_481  | Bacteria | Proteobacteria | Deltaproteobacteria | Spirobacillales   |                     |                |           |
| OTU_1096 | Bacteria | Proteobacteria | Deltaproteobacteria |                   |                     |                |           |
| OTU_429  | Bacteria | Proteobacteria | Gammaproteobacteria | [Marinicellales]  | [Marinicellaceae]   | Marinicella    |           |
| OTU_609  | Bacteria | Proteobacteria | Gammaproteobacteria | [Marinicellales]  | [Marinicellaceae]   |                |           |
| OTU_397  | Bacteria | Proteobacteria | Gammaproteobacteria | Alteromonadales   | Alteromonadaceae    | BD2-13         |           |
| OTU_1230 | Bacteria | Proteobacteria | Gammaproteobacteria | Alteromonadales   | Alteromonadaceae    | Marinobacter   |           |
| OTU_1216 | Bacteria | Proteobacteria | Gammaproteobacteria | Alteromonadales   | Alteromonadaceae    |                |           |
| OTU_492  | Bacteria | Proteobacteria | Gammaproteobacteria | Alteromonadales   | OM60                |                |           |
| OTU_433  | Bacteria | Proteobacteria | Gammaproteobacteria | Enterobacteriales | Enterobacteriaceae  | Leminorella    | grimontii |
| OTU_1288 | Bacteria | Proteobacteria | Gammaproteobacteria | Vibrionales       | Vibrionaceae        | Photobacterium |           |
| OTU_565  | Bacteria | Proteobacteria | Gammaproteobacteria |                   |                     |                |           |
| OTU_767  | Bacteria | Proteobacteria | Gammaproteobacteria |                   |                     |                |           |
| OTU_756  | Bacteria | Proteobacteria | TA18                | CV90              |                     |                |           |
| OTU_626  | Bacteria | Proteobacteria | TA18                | PHOS-HD29         |                     |                |           |
| OTU_1077 | Bacteria | Proteobacteria |                     |                   |                     |                |           |
| OTU_1114 | Bacteria | Bacteroidetes  | [Saprospirae]       | [Saprospirales]   | Saprospiraceae      |                |           |
| OTU_861  | Bacteria | Bacteroidetes  | [Saprospirae]       | [Saprospirales]   | Saprospiraceae      |                |           |
| OTU_973  | Bacteria | Bacteroidetes  | Bacteroidia         | Bacteroidales     | [Odoribacteraceae]  | Odoribacter    |           |
| OTU_393  | Bacteria | Bacteroidetes  | Bacteroidia         | Bacteroidales     | Bacteroidaceae      | Bacteroides    |           |
| OTU_1057 | Bacteria | Bacteroidetes  | Flavobacteriia      | Flavobacteriales  | [Weeksellaceae]     |                |           |
| OTU_745  | Bacteria | Bacteroidetes  | Flavobacteriia      | Flavobacteriales  | Flavobacteriaceae   | Aquimarina     |           |
| OTU_410  | Bacteria | Bacteroidetes  | Flavobacteriia      | Flavobacteriales  | Flavobacteriaceae   | Aquimarina     |           |
| OTU_1084 | Bacteria | Bacteroidetes  | Flavobacteriia      | Flavobacteriales  |                     |                |           |
| OTU_878  | Bacteria | Bacteroidetes  |                     |                   |                     |                |           |
| OTU_865  | Bacteria | Bacteroidetes  |                     |                   |                     |                |           |
| OTU_419  | Bacteria | Actinobacteria | Acidimicrobiia      | Acidimicrobiales  |                     |                |           |
| OTU_840  | Bacteria | Actinobacteria | Actinobacteria      | Actinomycetales   | Mycobacteriaceae    | Mycobacterium  |           |
| OTU_1222 | Bacteria | Firmicutes     | Bacilli             | Lactobacillales   | Aerococcaceae       | Facklamia      |           |
| OTU_1171 | Bacteria | Firmicutes     | Clostridia          | Clostridiales     | Clostridiaceae      |                |           |
| OTU_1006 | Bacteria | Firmicutes     | Clostridia          | Clostridiales     | Clostridiaceae      |                |           |
| OTU_943  | Bacteria | Firmicutes     | Clostridia          | Clostridiales     | Lachnospiraceae     |                |           |
| OTU_586  | Bacteria | Firmicutes     | Clostridia          | Clostridiales     | Lachnospiraceae     |                |           |
| OTU_775  | Bacteria | Firmicutes     | Clostridia          | Clostridiales     | Lachnospiraceae     |                |           |
| OTU_955  | Bacteria | Firmicutes     | Clostridia          | Clostridiales     | Lachnospiraceae     |                |           |
| OTU_1041 | Bacteria | Firmicutes     | Clostridia          | Clostridiales     | Ruminococcaceae     | Oscillospira   |           |
| OTU_617  | Bacteria | Firmicutes     | Clostridia          | Clostridiales     | Ruminococcaceae     | Ruminococcus   |           |
| OTU_1013 | Bacteria | Firmicutes     | Clostridia          | Clostridiales     | Ruminococcaceae     |                |           |
| OTU_971  | Bacteria | Firmicutes     | Clostridia          | Clostridiales     | Syntrophomonadaceae | Syntrophomonas |           |
| OTU_1016 | Bacteria | Firmicutes     | Clostridia          | Clostridiales     | Veillonellaceae     | Veillonella    |           |
| OTU_1257 | Bacteria | Firmicutes     | Clostridia          | Clostridiales     |                     |                |           |
| OTU_1113 | Bacteria | Firmicutes     | Clostridia          | Clostridiales     |                     |                |           |
| OTU_596  | Bacteria | Firmicutes     | Clostridia          | Clostridiales     |                     |                |           |

|          |              |                 |                  |                    |                     |                |
|----------|--------------|-----------------|------------------|--------------------|---------------------|----------------|
| OTU_619  | Bacteria     | Firmicutes      | Clostridia       | Clostridiales      |                     |                |
| OTU_1073 | Bacteria     | Firmicutes      | Clostridia       | Clostridiales      |                     |                |
| OTU_1123 | Bacteria     | Firmicutes      | Clostridia       | OPB54              |                     |                |
| OTU_1292 | Bacteria     | Firmicutes      | Erysipelotrichi  | Erysipelotrichales | Erysipelotrichaceae | Erysipelothrix |
| OTU_981  | Bacteria     | Acidobacteria   | Acidobacteria-6  | iii1-15            | RB40                |                |
| OTU_376  | Bacteria     | Acidobacteria   | Sva0725          | Sva0725            |                     |                |
| OTU_375  | Bacteria     | Acidobacteria   | Sva0725          | Sva0725            |                     |                |
| OTU_960  | Bacteria     | Armatimonadetes | [Fimbriimonadia] | [Fimbriimonadales] | [Fimbriimonadaceae] |                |
| OTU_858  | Bacteria     | Caldithrix      | Caldithrixae     | Caldithrixales     | BA059               |                |
| OTU_1136 | Bacteria     | Chloroflexi     | TK17             |                    |                     |                |
| OTU_977  | Bacteria     | Planctomycetes  | Phycisphaerae    | Phycisphaerales    |                     |                |
| OTU_1052 | Bacteria     | Planctomycetes  | Planctomycetia   | Pirellulales       | Pirellulaceae       |                |
| OTU_880  | Bacteria     | Planctomycetes  | Planctomycetia   | Planctomycetales   | Planctomycetaceae   | Planctomyces   |
| OTU_382  | Bacteria     | TM6             | SJA-4            |                    |                     |                |
| OTU_868  | Bacteria     | TM7             |                  |                    |                     |                |
| OTU_1162 | Bacteria     | Verrucomicrobia | [Pedosphaerae]   |                    |                     |                |
| OTU_583  | Bacteria     | Verrucomicrobia | Opitutae         | [Pelagicocales]    | [Pelagiococcaceae]  | Pelagicoccus   |
| OTU_947  | Bacteria     | Verrucomicrobia | Verrucomicrobiae | Verrucomicrobiales | Verrucomicrobiaceae | MSBL3          |
| OTU_886  | Bacteria     | Verrucomicrobia | Verrucomicrobiae | Verrucomicrobiales | Verrucomicrobiaceae |                |
| OTU_860  | Bacteria     |                 |                  |                    |                     |                |
| OTU_932  | Unclassified |                 |                  |                    |                     |                |
| OTU_987  | Bacteria     |                 |                  |                    |                     |                |
| OTU_1140 | Unclassified |                 |                  |                    |                     |                |
| OTU_954  | Unclassified |                 |                  |                    |                     |                |
| OTU_946  | Unclassified |                 |                  |                    |                     |                |
| OTU_330  | Bacteria     |                 |                  |                    |                     |                |
| OTU_1214 | Bacteria     |                 |                  |                    |                     |                |
| OTU_1294 | Bacteria     |                 |                  |                    |                     |                |
| OTU_332  | Bacteria     |                 |                  |                    |                     |                |
| OTU_699  | Bacteria     |                 |                  |                    |                     |                |
| OTU_1302 | Bacteria     |                 |                  |                    |                     |                |
| OTU_1295 | Bacteria     |                 |                  |                    |                     |                |
| OTU_933  | Bacteria     |                 |                  |                    |                     |                |
| OTU_778  | Bacteria     |                 |                  |                    |                     |                |
| OTU_785  | Unclassified |                 |                  |                    |                     |                |
| OTU_1054 | Unclassified |                 |                  |                    |                     |                |
| OTU_1262 | Bacteria     |                 |                  |                    |                     |                |
| OTU_576  | Unclassified |                 |                  |                    |                     |                |
| OTU_1208 | Bacteria     |                 |                  |                    |                     |                |
| OTU_1277 | Bacteria     |                 |                  |                    |                     |                |
| OTU_776  | Bacteria     |                 |                  |                    |                     |                |
| OTU_666  | Bacteria     |                 |                  |                    |                     |                |
| OTU_948  | Unclassified |                 |                  |                    |                     |                |

|          |          |
|----------|----------|
| OTU_896  | Bacteria |
| OTU_1179 | Bacteria |
| OTU_177  | Bacteria |
| OTU_905  | Bacteria |
| OTU_1075 | Bacteria |
| OTU_378  | Bacteria |

CWS.W

| OTUs     | Kingdom  | Phylum         | Class               | Order              | Family              | Genus            | Specie     |
|----------|----------|----------------|---------------------|--------------------|---------------------|------------------|------------|
| OTU_993  | Bacteria | Proteobacteria | Alphaproteobacteria | BD7-3              |                     |                  |            |
| OTU_742  | Bacteria | Proteobacteria | Alphaproteobacteria | Caulobacterales    | Caulobacteraceae    | Phenylobacterium |            |
| OTU_1297 | Bacteria | Proteobacteria | Alphaproteobacteria | Rhizobiales        | Bradyrhizobiaceae   | Balneimonas      |            |
| OTU_1235 | Bacteria | Proteobacteria | Alphaproteobacteria | Rhodospirillales   | Acetobacteraceae    |                  |            |
| OTU_1174 | Bacteria | Proteobacteria | Alphaproteobacteria | Rhodospirillales   |                     |                  |            |
| OTU_891  | Bacteria | Proteobacteria | Alphaproteobacteria | Rickettsiales      |                     |                  |            |
| OTU_717  | Bacteria | Proteobacteria | Alphaproteobacteria | Rickettsiales      |                     |                  |            |
| OTU_1227 | Bacteria | Proteobacteria | Alphaproteobacteria | Rickettsiales      |                     |                  |            |
| OTU_1245 | Bacteria | Proteobacteria | Alphaproteobacteria | Rickettsiales      |                     |                  |            |
| OTU_983  | Bacteria | Proteobacteria | Alphaproteobacteria | Rickettsiales      |                     |                  |            |
| OTU_1044 | Bacteria | Proteobacteria | Alphaproteobacteria |                    |                     |                  |            |
| OTU_902  | Bacteria | Proteobacteria | Alphaproteobacteria |                    |                     |                  |            |
| OTU_764  | Bacteria | Proteobacteria | Betaproteobacteria  | Neisseriales       | Neisseriaceae       | Vitreoscilla     |            |
| OTU_116  | Bacteria | Proteobacteria | Deltaproteobacteria | Bdellovibrionales  | Bacteriovoracaceae  | Bacteriovorax    |            |
| OTU_248  | Bacteria | Proteobacteria | Deltaproteobacteria | Bdellovibrionales  | Bacteriovoracaceae  |                  |            |
| OTU_1092 | Bacteria | Proteobacteria | Deltaproteobacteria | Desulfobacterales  | Desulfobulbaceae    | Desulfobulbus    |            |
| OTU_1023 | Bacteria | Proteobacteria | Deltaproteobacteria | Desulfobacterales  | Desulfobulbaceae    |                  |            |
| OTU_231  | Bacteria | Proteobacteria | Deltaproteobacteria | Desulfobacterales  | Desulfobulbaceae    |                  |            |
| OTU_549  | Bacteria | Proteobacteria | Deltaproteobacteria | Desulfovibrionales | Desulfovibrionaceae | Desulfovibrio    |            |
| OTU_908  | Bacteria | Proteobacteria | Deltaproteobacteria | Desulfovibrionales | Desulfovibrionaceae |                  |            |
| OTU_1026 | Bacteria | Proteobacteria | Deltaproteobacteria | GMD14H09           |                     |                  |            |
| OTU_1079 | Bacteria | Proteobacteria | Deltaproteobacteria |                    |                     |                  |            |
| OTU_236  | Bacteria | Proteobacteria | Gammaproteobacteria | Alteromonadales    |                     |                  |            |
| OTU_1131 | Bacteria | Proteobacteria | Gammaproteobacteria | Enterobacteriales  | Enterobacteriaceae  | Serratia         | symbiotica |
| OTU_979  | Bacteria | Proteobacteria | Gammaproteobacteria | Enterobacteriales  | Enterobacteriaceae  |                  |            |
| OTU_780  | Bacteria | Proteobacteria | Gammaproteobacteria | Legionellales      | Legionellaceae      |                  |            |
| OTU_1129 | Bacteria | Proteobacteria | Gammaproteobacteria |                    |                     |                  |            |
| OTU_1266 | Bacteria | Proteobacteria |                     |                    |                     |                  |            |
| OTU_683  | Bacteria | Proteobacteria |                     |                    |                     |                  |            |
| OTU_872  | Bacteria | Proteobacteria |                     |                    |                     |                  |            |
| OTU_1086 | Bacteria | Proteobacteria |                     |                    |                     |                  |            |
| OTU_1111 | Bacteria | Proteobacteria |                     |                    |                     |                  |            |
| OTU_197  | Bacteria | Bacteroidetes  | [Saprospirae]       | [Saprospirales]    | Saprospiraceae      |                  |            |
| OTU_669  | Bacteria | Bacteroidetes  | [Saprospirae]       | [Saprospirales]    | Saprospiraceae      |                  |            |



|          |          |                |                  |                    |                        |                            |         |
|----------|----------|----------------|------------------|--------------------|------------------------|----------------------------|---------|
| OTU_112  | Bacteria | Bacteroidetes  | Bacteroidia      | Bacteroidales      | Marinilabiaceae        |                            |         |
| OTU_567  | Bacteria | Bacteroidetes  | Bacteroidia      | Bacteroidales      | Marinilabiaceae        |                            |         |
| OTU_295  | Bacteria | Bacteroidetes  | Bacteroidia      | Bacteroidales      | Marinilabiaceae        |                            |         |
| OTU_1144 | Bacteria | Bacteroidetes  | Bacteroidia      | Bacteroidales      | Porphyromonadaceae     | Paludibacter               |         |
| OTU_1281 | Bacteria | Bacteroidetes  | Bacteroidia      | Bacteroidales      | S24-7                  |                            |         |
| OTU_357  | Bacteria | Bacteroidetes  | Bacteroidia      | Bacteroidales      |                        |                            |         |
| OTU_1148 | Bacteria | Bacteroidetes  | Cytophagia       | Cytophagales       | Flammeovirgaceae       | JTB248                     |         |
| OTU_1165 | Bacteria | Bacteroidetes  | Sphingobacteriia | Sphingobacteriales |                        |                            |         |
| OTU_443  | Bacteria | Bacteroidetes  |                  |                    |                        |                            |         |
| OTU_1256 | Bacteria | Bacteroidetes  |                  |                    |                        |                            |         |
| OTU_527  | Bacteria | Bacteroidetes  |                  |                    |                        |                            |         |
| OTU_1212 | Bacteria | Actinobacteria | Acidimicrobiia   | Acidimicrobiales   |                        |                            |         |
| OTU_551  | Bacteria | Actinobacteria | Acidimicrobiia   | Acidimicrobiales   |                        |                            |         |
| OTU_722  | Bacteria | Actinobacteria | Actinobacteria   | Actinomycetales    | Corynebacteriaceae     | Corynebacterium            |         |
| OTU_912  | Bacteria | Actinobacteria | Rubrobacteria    | Rubrobacterales    | Rubrobacteraceae       | Rubrobacter                |         |
| OTU_554  | Bacteria | Actinobacteria | Rubrobacteria    | Rubrobacterales    | Rubrobacteraceae       |                            |         |
| OTU_949  | Bacteria | Actinobacteria | Thermoleophilia  | Gaiellales         | Gaiellaceae            |                            |         |
| OTU_672  | Bacteria | Actinobacteria | Thermoleophilia  | Gaiellales         | Gaiellaceae            |                            |         |
| OTU_425  | Bacteria | Firmicutes     | Bacilli          | Bacillales         | Bacillaceae            | Bacillus                   |         |
| OTU_55   | Bacteria | Firmicutes     | Clostridia       | Clostridiales      | [Acidaminobacteraceae] | Fusibacter                 |         |
| OTU_409  | Bacteria | Firmicutes     | Clostridia       | Clostridiales      | [Acidaminobacteraceae] | Fusibacter                 |         |
| OTU_356  | Bacteria | Firmicutes     | Clostridia       | Clostridiales      | [Acidaminobacteraceae] | WH1-8                      |         |
| OTU_1170 | Bacteria | Firmicutes     | Clostridia       | Clostridiales      | [Mogibacteriaceae]     | Anaerovorax                |         |
| OTU_1043 | Bacteria | Firmicutes     | Clostridia       | Clostridiales      | [Tissierellaceae]      | Sporanaerobacter           |         |
| OTU_1253 | Bacteria | Firmicutes     | Clostridia       | Clostridiales      | Christensenellaceae    |                            |         |
| OTU_1176 | Bacteria | Firmicutes     | Clostridia       | Clostridiales      | Christensenellaceae    |                            |         |
| OTU_1126 | Bacteria | Firmicutes     | Clostridia       | Clostridiales      | Clostridiaceae         |                            |         |
| OTU_998  | Bacteria | Firmicutes     | Clostridia       | Clostridiales      | Eubacteriaceae         | Sudoramibacter_Eubacterium |         |
| OTU_966  | Bacteria | Firmicutes     | Clostridia       | Clostridiales      | Lachnospiraceae        |                            |         |
| OTU_1282 | Bacteria | Firmicutes     | Clostridia       | Clostridiales      | Lachnospiraceae        |                            |         |
| OTU_1153 | Bacteria | Firmicutes     | Clostridia       | Clostridiales      | Lachnospiraceae        |                            |         |
| OTU_1139 | Bacteria | Firmicutes     | Clostridia       | Clostridiales      | Peptostreptococcaceae  | Peptostreptococcus         |         |
| OTU_1020 | Bacteria | Firmicutes     | Clostridia       | Clostridiales      |                        |                            |         |
| OTU_885  | Bacteria | Firmicutes     | Clostridia       | Clostridiales      |                        |                            |         |
| OTU_995  | Bacteria | Firmicutes     | Clostridia       | Clostridiales      |                        |                            |         |
| OTU_1191 | Bacteria | Firmicutes     | Clostridia       | Natranaerobiales   | Anaerobrancaceae       | Dethiobacter               |         |
| OTU_621  | Bacteria | Acidobacteria  | Acidobacteria-6  | iii1-15            |                        |                            |         |
| OTU_256  | Bacteria | Chlorobi       | SJA-28           |                    |                        |                            |         |
| OTU_740  | Bacteria | Chloroflexi    | Anaerolineae     | Anaerolineales     | Anaerolinaceae         | WCHB1-05                   |         |
| OTU_585  | Bacteria | Chloroflexi    | Anaerolineae     | S0208              |                        |                            |         |
| OTU_735  | Bacteria | Chloroflexi    | Anaerolineae     |                    |                        |                            |         |
| OTU_270  | Bacteria | Fibrobacteres  | TG3              | TG3-2              |                        |                            |         |
| OTU_59   | Bacteria | Fusobacteria   | Fusobacteriia    | Fusobacteriales    | Fusobacteriaceae       | Cetobacterium              | somerae |

|          |              |                  |                  |                 |                            |                |
|----------|--------------|------------------|------------------|-----------------|----------------------------|----------------|
| OTU_540  | Bacteria     | Fusobacteria     | Fusobacteriia    | Fusobacteriales | Fusobacteriaceae           | Fusobacterium  |
| OTU_202  | Bacteria     | Fusobacteria     | Fusobacteriia    | Fusobacteriales | Fusobacteriaceae           | Propionigenium |
| OTU_873  | Bacteria     | Gemmatimonadetes | Gemmatimonadetes |                 |                            |                |
| OTU_957  | Bacteria     | Nitrospirae      | Nitrospira       | Nitrospirales   | Apr-29                     |                |
| OTU_989  | Bacteria     | Nitrospirae      | Nitrospira       | Nitrospirales   | 'hermodesulfovibrionaceae] |                |
| OTU_846  | Bacteria     | OP9              | JS1              | BA021           |                            |                |
| OTU_396  | Bacteria     | Tenericutes      | CK-1C4-19        |                 |                            |                |
| OTU_1300 | Bacteria     | TM7              |                  |                 |                            |                |
| OTU_1247 | Bacteria     |                  |                  |                 |                            |                |
| OTU_581  | Bacteria     |                  |                  |                 |                            |                |
| OTU_985  | Bacteria     |                  |                  |                 |                            |                |
| OTU_480  | Unclassified |                  |                  |                 |                            |                |
| OTU_1115 | Unclassified |                  |                  |                 |                            |                |
| OTU_1150 | Bacteria     |                  |                  |                 |                            |                |
| OTU_1252 | Bacteria     |                  |                  |                 |                            |                |
| OTU_1175 | Bacteria     |                  |                  |                 |                            |                |
| OTU_728  | Bacteria     |                  |                  |                 |                            |                |
| OTU_678  | Unclassified |                  |                  |                 |                            |                |
| OTU_1002 | Unclassified |                  |                  |                 |                            |                |
| OTU_1037 | Bacteria     |                  |                  |                 |                            |                |
| OTU_658  | Unclassified |                  |                  |                 |                            |                |
| OTU_877  | Bacteria     |                  |                  |                 |                            |                |
| OTU_788  | Bacteria     |                  |                  |                 |                            |                |
| OTU_1051 | Bacteria     |                  |                  |                 |                            |                |
| OTU_1261 | Bacteria     |                  |                  |                 |                            |                |
| OTU_680  | Bacteria     |                  |                  |                 |                            |                |
| OTU_935  | Bacteria     |                  |                  |                 |                            |                |
| OTU_929  | Bacteria     |                  |                  |                 |                            |                |
| OTU_406  | Bacteria     |                  |                  |                 |                            |                |
| OTU_462  | Bacteria     |                  |                  |                 |                            |                |
| OTU_568  | Bacteria     |                  |                  |                 |                            |                |
| OTU_502  | Bacteria     |                  |                  |                 |                            |                |
| OTU_1285 | Bacteria     |                  |                  |                 |                            |                |
| OTU_525  | Bacteria     |                  |                  |                 |                            |                |
| OTU_522  | Bacteria     |                  |                  |                 |                            |                |
| OTU_613  | Bacteria     |                  |                  |                 |                            |                |
| OTU_1238 | Unclassified |                  |                  |                 |                            |                |
| OTU_1069 | Bacteria     |                  |                  |                 |                            |                |
| OTU_887  | Bacteria     |                  |                  |                 |                            |                |
| OTU_1137 | Bacteria     |                  |                  |                 |                            |                |
| OTU_1063 | Bacteria     |                  |                  |                 |                            |                |
| OTU_1204 | Bacteria     |                  |                  |                 |                            |                |
| OTU_552  | Bacteria     |                  |                  |                 |                            |                |

OTU\_631

Unclassified

## BFT.W x CWS.W

| OTUs     | Kingdom  | Phylum         | Class               | Order               | Family               | Genus             | Specie   |
|----------|----------|----------------|---------------------|---------------------|----------------------|-------------------|----------|
| OTU_449  | Bacteria | Proteobacteria | Alphaproteobacteria | BD7-3               |                      |                   |          |
| OTU_407  | Bacteria | Proteobacteria | Alphaproteobacteria | Rhizobiales         | Brucellaceae         |                   |          |
| OTU_239  | Bacteria | Proteobacteria | Alphaproteobacteria | Rhizobiales         | Cohaesibacteraceae   | Cohaesibacter     |          |
| OTU_883  | Bacteria | Proteobacteria | Alphaproteobacteria | Rhizobiales         | Hyphomicrobiaceae    | Hyphomicrobium    |          |
| OTU_485  | Bacteria | Proteobacteria | Alphaproteobacteria | Rhizobiales         |                      |                   |          |
| OTU_897  | Bacteria | Proteobacteria | Alphaproteobacteria | Rhizobiales         |                      |                   |          |
| OTU_795  | Bacteria | Proteobacteria | Alphaproteobacteria | Rhodobacterales     | Hyphomonadaceae      |                   |          |
| OTU_1120 | Bacteria | Proteobacteria | Alphaproteobacteria | Rhodobacterales     | Hyphomonadaceae      |                   |          |
| OTU_392  | Bacteria | Proteobacteria | Alphaproteobacteria | Rhodospirillales    | Rhodospirillaceae    |                   |          |
| OTU_809  | Bacteria | Proteobacteria | Alphaproteobacteria | Rhodospirillales    | Rhodospirillaceae    |                   |          |
| OTU_807  | Bacteria | Proteobacteria | Alphaproteobacteria | Rhodospirillales    | Rhodospirillaceae    |                   |          |
| OTU_1149 | Bacteria | Proteobacteria | Alphaproteobacteria | Rhodospirillales    | Rhodospirillaceae    |                   |          |
| OTU_512  | Bacteria | Proteobacteria | Alphaproteobacteria | Rhodospirillales    | Rhodospirillaceae    |                   |          |
| OTU_823  | Bacteria | Proteobacteria | Alphaproteobacteria | Rhodospirillales    | Rhodospirillaceae    | Phaeospirillum    |          |
| OTU_1160 | Bacteria | Proteobacteria | Alphaproteobacteria | Rhodospirillales    | Rhodospirillaceae    |                   |          |
| OTU_597  | Bacteria | Proteobacteria | Alphaproteobacteria | Rhodospirillales    |                      |                   |          |
| OTU_1219 | Bacteria | Proteobacteria | Alphaproteobacteria |                     |                      |                   |          |
| OTU_408  | Bacteria | Proteobacteria | Betaproteobacteria  | Burkholderiales     | Alcaligenaceae       | Alcaligenes       | faecalis |
| OTU_193  | Bacteria | Proteobacteria | Betaproteobacteria  | Burkholderiales     | Alcaligenaceae       |                   |          |
| OTU_500  | Bacteria | Proteobacteria | Betaproteobacteria  | Burkholderiales     | Comamonadaceae       | Rubrivivax        |          |
| OTU_1047 | Bacteria | Proteobacteria | Betaproteobacteria  | Burkholderiales     | Comamonadaceae       |                   |          |
| OTU_923  | Bacteria | Proteobacteria | Betaproteobacteria  | Burkholderiales     | Comamonadaceae       | Comamonas         |          |
| OTU_438  | Bacteria | Proteobacteria | Betaproteobacteria  | Nitrosomonadales    | Nitrosomonadaceae    |                   |          |
| OTU_628  | Bacteria | Proteobacteria | Betaproteobacteria  | Nitrosomonadales    | Nitrosomonadaceae    |                   |          |
| OTU_199  | Bacteria | Proteobacteria | Betaproteobacteria  | Nitrosomonadales    | Nitrosomonadaceae    |                   |          |
| OTU_129  | Bacteria | Proteobacteria | Betaproteobacteria  | Rhodocyclales       | Rhodocyclaceae       | Dok59             |          |
| OTU_789  | Bacteria | Proteobacteria | Betaproteobacteria  | Rhodocyclales       | Rhodocyclaceae       | Methyloversatilis |          |
| OTU_963  | Bacteria | Proteobacteria | Betaproteobacteria  | SBl14               |                      |                   |          |
| OTU_627  | Bacteria | Proteobacteria | Deltaproteobacteria | Desulfovibrionales  | Desulfovibrionaceae  |                   |          |
| OTU_559  | Bacteria | Proteobacteria | Deltaproteobacteria | Desulfuromonadales  | Geobacteraceae       | Geobacter         |          |
| OTU_584  | Bacteria | Proteobacteria | Deltaproteobacteria | DTB120              |                      |                   |          |
| OTU_166  | Bacteria | Proteobacteria | Deltaproteobacteria | Myxococcales        | Haliangiaceae        |                   |          |
| OTU_389  | Bacteria | Proteobacteria | Deltaproteobacteria | Myxococcales        | OM27                 |                   |          |
| OTU_440  | Bacteria | Proteobacteria | Deltaproteobacteria | Myxococcales        |                      |                   |          |
| OTU_569  | Bacteria | Proteobacteria | Deltaproteobacteria | Myxococcales        |                      |                   |          |
| OTU_941  | Bacteria | Proteobacteria | Deltaproteobacteria | Myxococcales        |                      |                   |          |
| OTU_1152 | Bacteria | Proteobacteria | Deltaproteobacteria | NB1-j               |                      |                   |          |
| OTU_1210 | Bacteria | Proteobacteria | Deltaproteobacteria | Syntrophobacterales | Syntrophobacteraceae |                   |          |
| OTU_272  | Bacteria | Proteobacteria | Deltaproteobacteria |                     |                      |                   |          |

|          |          |                |                       |                   |                      |                 |           |
|----------|----------|----------------|-----------------------|-------------------|----------------------|-----------------|-----------|
| OTU_907  | Bacteria | Proteobacteria | Epsilonproteobacteria | Campylobacterales | Helicobacteraceae    | Helicobacter    |           |
| OTU_931  | Bacteria | Proteobacteria | Gammaproteobacteria   | Pseudomonadales   | Moraxellaceae        | Acinetobacter   |           |
| OTU_600  | Bacteria | Proteobacteria | Gammaproteobacteria   | Pseudomonadales   | Pseudomonadaceae     |                 |           |
| OTU_215  | Bacteria | Proteobacteria | Gammaproteobacteria   | Pseudomonadales   | Pseudomonadaceae     |                 |           |
| OTU_624  | Bacteria | Proteobacteria | Gammaproteobacteria   | Pseudomonadales   | Pseudomonadaceae     | Pseudomonas     |           |
| OTU_211  | Bacteria | Proteobacteria | Gammaproteobacteria   | Thiotrichales     | Piscirickettsiaceae  |                 |           |
| OTU_164  | Bacteria | Proteobacteria | Gammaproteobacteria   | Xanthomonadales   | Xanthomonadaceae     |                 |           |
| OTU_875  | Bacteria | Proteobacteria | Gammaproteobacteria   |                   |                      |                 |           |
| OTU_238  | Bacteria | Proteobacteria | Gammaproteobacteria   |                   |                      |                 |           |
| OTU_232  | Bacteria | Bacteroidetes  | [Saprospirae]         | [Saprospirales]   | Saprospiraceae       |                 |           |
| OTU_460  | Bacteria | Bacteroidetes  | [Saprospirae]         | [Saprospirales]   | Saprospiraceae       |                 |           |
| OTU_573  | Bacteria | Bacteroidetes  | Bacteroidia           | Bacteroidales     | [Odoribacteraceae]   | Odoribacter     |           |
| OTU_537  | Bacteria | Bacteroidetes  | Bacteroidia           | Bacteroidales     | [Paraprevotellaceae] | [Prevotella]    |           |
| OTU_593  | Bacteria | Bacteroidetes  | Bacteroidia           | Bacteroidales     | Bacteroidaceae       | Bacteroides     | coprosuis |
| OTU_729  | Bacteria | Bacteroidetes  | Bacteroidia           | Bacteroidales     | Bacteroidaceae       | Bacteroides     |           |
| OTU_383  | Bacteria | Bacteroidetes  | Bacteroidia           | Bacteroidales     | Bacteroidaceae       | Bacteroides     |           |
| OTU_668  | Bacteria | Bacteroidetes  | Bacteroidia           | Bacteroidales     | Bacteroidaceae       | Bacteroides     |           |
| OTU_808  | Bacteria | Bacteroidetes  | Bacteroidia           | Bacteroidales     | Porphyromonadaceae   |                 |           |
| OTU_524  | Bacteria | Bacteroidetes  | Bacteroidia           | Bacteroidales     | Porphyromonadaceae   |                 |           |
| OTU_968  | Bacteria | Bacteroidetes  | Bacteroidia           | Bacteroidales     | Porphyromonadaceae   | Paludibacter    |           |
| OTU_739  | Bacteria | Bacteroidetes  | Bacteroidia           | Bacteroidales     | Porphyromonadaceae   |                 |           |
| OTU_817  | Bacteria | Bacteroidetes  | Bacteroidia           | Bacteroidales     | Porphyromonadaceae   |                 |           |
| OTU_561  | Bacteria | Bacteroidetes  | Bacteroidia           | Bacteroidales     | Rikenellaceae        |                 |           |
| OTU_794  | Bacteria | Bacteroidetes  | Bacteroidia           | Bacteroidales     | Rikenellaceae        |                 |           |
| OTU_694  | Bacteria | Bacteroidetes  | Bacteroidia           | Bacteroidales     | Rikenellaceae        |                 |           |
| OTU_710  | Bacteria | Bacteroidetes  | Bacteroidia           | Bacteroidales     | S24-7                |                 |           |
| OTU_1141 | Bacteria | Bacteroidetes  | Bacteroidia           | Bacteroidales     | S24-7                |                 |           |
| OTU_1195 | Bacteria | Bacteroidetes  | Bacteroidia           | Bacteroidales     | S24-7                |                 |           |
| OTU_635  | Bacteria | Bacteroidetes  | Bacteroidia           | Bacteroidales     | S24-7                |                 |           |
| OTU_1094 | Bacteria | Bacteroidetes  | Bacteroidia           | Bacteroidales     | S24-7                |                 |           |
| OTU_422  | Bacteria | Bacteroidetes  | Bacteroidia           | Bacteroidales     |                      |                 |           |
| OTU_1283 | Bacteria | Bacteroidetes  | Cytophagia            | Cytophagales      | Cytophagaceae        |                 |           |
| OTU_572  | Bacteria | Bacteroidetes  | Cytophagia            | Cytophagales      | Cytophagaceae        |                 |           |
| OTU_803  | Bacteria | Bacteroidetes  | Flavobacteriia        | Flavobacteriales  | Cryomorphaceae       | Cryomorpha      |           |
| OTU_343  | Bacteria | Bacteroidetes  | Flavobacteriia        | Flavobacteriales  | Cryomorphaceae       |                 |           |
| OTU_749  | Bacteria | Bacteroidetes  | Flavobacteriia        | Flavobacteriales  | Flavobacteriaceae    | Psychroserpens  |           |
| OTU_871  | Bacteria | Actinobacteria | KIST-JJY010           |                   |                      |                 |           |
| OTU_744  | Bacteria | Firmicutes     | Bacilli               | Turicibacterales  | Turicibacteraceae    | Turicibacter    |           |
| OTU_882  | Bacteria | Firmicutes     | Clostridia            | Clostridiales     | [Tissierellaceae]    | Sedimentibacter |           |
| OTU_639  | Bacteria | Firmicutes     | Clostridia            | Clostridiales     | [Tissierellaceae]    | GW-34           |           |
| OTU_942  | Bacteria | Firmicutes     | Clostridia            | Clostridiales     | [Tissierellaceae]    |                 |           |
| OTU_544  | Bacteria | Firmicutes     | Clostridia            | Clostridiales     | [Tissierellaceae]    | Tepidimicrobium |           |
| OTU_667  | Bacteria | Firmicutes     | Clostridia            | Clostridiales     | [Tissierellaceae]    |                 |           |

|          |          |            |            |                  |                       |                  |
|----------|----------|------------|------------|------------------|-----------------------|------------------|
| OTU_1008 | Bacteria | Firmicutes | Clostridia | Clostridiales    | Caldicoprobacteraceae | Caldicoprobacter |
| OTU_486  | Bacteria | Firmicutes | Clostridia | Clostridiales    | Clostridiaceae        | Clostridium      |
| OTU_799  | Bacteria | Firmicutes | Clostridia | Clostridiales    | Clostridiaceae        | Clostridium      |
| OTU_925  | Bacteria | Firmicutes | Clostridia | Clostridiales    | Clostridiaceae        | Clostridium      |
| OTU_641  | Bacteria | Firmicutes | Clostridia | Clostridiales    | Clostridiaceae        | Clostridium      |
| OTU_1270 | Bacteria | Firmicutes | Clostridia | Clostridiales    | Clostridiaceae        | Clostridium      |
| OTU_892  | Bacteria | Firmicutes | Clostridia | Clostridiales    | Gracilibacteraceae    |                  |
| OTU_546  | Bacteria | Firmicutes | Clostridia | Clostridiales    | Gracilibacteraceae    | Lutispora        |
| OTU_978  | Bacteria | Firmicutes | Clostridia | Clostridiales    | Lachnospiraceae       |                  |
| OTU_516  | Bacteria | Firmicutes | Clostridia | Clostridiales    | Lachnospiraceae       |                  |
| OTU_1003 | Bacteria | Firmicutes | Clostridia | Clostridiales    | Lachnospiraceae       |                  |
| OTU_832  | Bacteria | Firmicutes | Clostridia | Clostridiales    | Lachnospiraceae       |                  |
| OTU_1275 | Bacteria | Firmicutes | Clostridia | Clostridiales    | Lachnospiraceae       |                  |
| OTU_703  | Bacteria | Firmicutes | Clostridia | Clostridiales    | Lachnospiraceae       |                  |
| OTU_451  | Bacteria | Firmicutes | Clostridia | Clostridiales    | Peptococcaceae        | Pelotomaculum    |
| OTU_671  | Bacteria | Firmicutes | Clostridia | Clostridiales    | Peptococcaceae        |                  |
| OTU_962  | Bacteria | Firmicutes | Clostridia | Clostridiales    | Peptococcaceae        | Pelotomaculum    |
| OTU_1119 | Bacteria | Firmicutes | Clostridia | Clostridiales    | Peptococcaceae        | Pelotomaculum    |
| OTU_1206 | Bacteria | Firmicutes | Clostridia | Clostridiales    | Ruminococcaceae       |                  |
| OTU_434  | Bacteria | Firmicutes | Clostridia | Clostridiales    | Ruminococcaceae       | Oscillospira     |
| OTU_714  | Bacteria | Firmicutes | Clostridia | Clostridiales    | Ruminococcaceae       | Ruminococcus     |
| OTU_454  | Bacteria | Firmicutes | Clostridia | Clostridiales    | Ruminococcaceae       |                  |
| OTU_315  | Bacteria | Firmicutes | Clostridia | Clostridiales    | Ruminococcaceae       |                  |
| OTU_924  | Bacteria | Firmicutes | Clostridia | Clostridiales    | Ruminococcaceae       |                  |
| OTU_1242 | Bacteria | Firmicutes | Clostridia | Clostridiales    | Ruminococcaceae       | Ruminococcus     |
| OTU_690  | Bacteria | Firmicutes | Clostridia | Clostridiales    | Ruminococcaceae       |                  |
| OTU_610  | Bacteria | Firmicutes | Clostridia | Clostridiales    | Syntrophomonadaceae   | Syntrophomonas   |
| OTU_1156 | Bacteria | Firmicutes | Clostridia | Clostridiales    | Syntrophomonadaceae   | Syntrophomonas   |
| OTU_321  | Bacteria | Firmicutes | Clostridia | Clostridiales    |                       |                  |
| OTU_436  | Bacteria | Firmicutes | Clostridia | Clostridiales    |                       |                  |
| OTU_1296 | Bacteria | Firmicutes | Clostridia | Clostridiales    |                       |                  |
| OTU_616  | Bacteria | Firmicutes | Clostridia | Clostridiales    |                       |                  |
| OTU_1081 | Bacteria | Firmicutes | Clostridia | Clostridiales    |                       |                  |
| OTU_478  | Bacteria | Firmicutes | Clostridia | Clostridiales    |                       |                  |
| OTU_553  | Bacteria | Firmicutes | Clostridia | Clostridiales    |                       |                  |
| OTU_251  | Bacteria | Firmicutes | Clostridia | Clostridiales    |                       |                  |
| OTU_1158 | Bacteria | Firmicutes | Clostridia | Clostridiales    |                       |                  |
| OTU_1279 | Bacteria | Firmicutes | Clostridia | Clostridiales    |                       |                  |
| OTU_821  | Bacteria | Firmicutes | Clostridia | Clostridiales    |                       |                  |
| OTU_1271 | Bacteria | Firmicutes | Clostridia | Clostridiales    |                       |                  |
| OTU_771  | Bacteria | Firmicutes | Clostridia | Halanaerobiales  | Halanaerobiaceae      |                  |
| OTU_1147 | Bacteria | Firmicutes | Clostridia | MBA08            |                       |                  |
| OTU_797  | Bacteria | Firmicutes | Clostridia | Natranaerobiales | Anaerobrancaceae      | Dethiobacter     |

|          |          |                 |                  |                    |                         |                     |              |
|----------|----------|-----------------|------------------|--------------------|-------------------------|---------------------|--------------|
| OTU_833  | Bacteria | Firmicutes      | Clostridia       | Natranaerobiales   | ML1228J-1               |                     |              |
| OTU_1218 | Bacteria | Firmicutes      | Clostridia       | OPB54              |                         |                     |              |
| OTU_834  | Bacteria | Firmicutes      | Clostridia       | SHA-98             |                         |                     |              |
| OTU_700  | Bacteria | Firmicutes      | Erysipelotrichi  | Erysipelotrichales | Erysipelotrichaceae     | Erysipelothrix      |              |
| OTU_1112 | Bacteria | Firmicutes      | Erysipelotrichi  | Erysipelotrichales | Erysipelotrichaceae     | Erysipelothrix      |              |
| OTU_1201 | Bacteria | Firmicutes      |                  |                    |                         |                     |              |
| OTU_1155 | Bacteria | Firmicutes      |                  |                    |                         |                     |              |
| OTU_605  | Bacteria | Acidobacteria   | Acidobacteria-6  | CCU21              |                         |                     |              |
| OTU_762  | Bacteria | Acidobacteria   | Acidobacteria-6  | iii1-15            |                         |                     |              |
| OTU_813  | Bacteria | Acidobacteria   | iii1-8           | SJA-36             |                         |                     |              |
| OTU_489  | Bacteria | Acidobacteria   | Solibacteres     | Solibacterales     |                         |                     |              |
| OTU_893  | Bacteria | Acidobacteria   | Solibacteres     | Solibacterales     |                         |                     |              |
| OTU_467  | Bacteria | Acidobacteria   | Solibacteres     | Solibacterales     |                         |                     |              |
| OTU_261  | Bacteria | Armatimonadetes | [Fimbriimonadia] | [Fimbriimonadales] | [Fimbriimonadaceae]     |                     |              |
| OTU_287  | Bacteria | Chlorobi        | BSV26            | C20                |                         |                     |              |
| OTU_319  | Bacteria | Chlorobi        | Ignavibacteria   | Ignavibacteriales  | Ignavibacteriaceae      |                     |              |
| OTU_317  | Bacteria | Chlorobi        | Ignavibacteria   | Ignavibacteriales  | Ignavibacteriaceae      |                     |              |
| OTU_660  | Bacteria | Chlorobi        | Ignavibacteria   | Ignavibacteriales  | Ignavibacteriaceae      |                     |              |
| OTU_1117 | Bacteria | Chlorobi        | OPB56            |                    |                         |                     |              |
| OTU_782  | Bacteria | Chlorobi        | SJA-28           |                    |                         |                     |              |
| OTU_157  | Bacteria | Chlorobi        | SJA-28           |                    |                         |                     |              |
| OTU_201  | Bacteria | Chloroflexi     | Anaerolineae     | A31                | S47                     |                     |              |
| OTU_263  | Bacteria | Chloroflexi     | Anaerolineae     | A31                | S47                     |                     |              |
| OTU_589  | Bacteria | Chloroflexi     | Anaerolineae     | S0208              |                         |                     |              |
| OTU_447  | Bacteria | Chloroflexi     | TK17             | mle1-48            |                         |                     |              |
| OTU_686  | Bacteria | Deferribacteres | Deferribacteres  | Deferribacterales  | Deferribacteraceae      | Geovibrio           | thiophilus   |
| OTU_914  | Bacteria | Fibrobacteres   | Fibrobacteria    | Fibrobacterales    | Fibrobacteraceae        | Fibrobacter         | succinogenes |
| OTU_188  | Bacteria | Nitrospirae     | Nitrospira       | Nitrospirales      | Nitrospiraceae          | Nitrospira          |              |
| OTU_490  | Bacteria | Planctomycetes  | [Brocadiae]      | Brocadiales        | Brocadiaceae            | Candidatus Jettenia |              |
| OTU_555  | Bacteria | Planctomycetes  | Phycisphaerae    | Phycisphaerales    |                         |                     |              |
| OTU_1192 | Bacteria | Spirochaetes    | MVP-15           | PL-11B10           |                         |                     |              |
| OTU_727  | Bacteria | Synergistetes   | Synergistia      | Synergistales      | Dethiosulfovibrionaceae | Aminobacterium      |              |
| OTU_308  | Bacteria | Tenericutes     | Mollicutes       | Acholeplasmatales  | Acholeplasmataceae      |                     |              |
| OTU_913  | Bacteria | Tenericutes     | Mollicutes       | Acholeplasmatales  | Acholeplasmataceae      | Acholeplasma        |              |
| OTU_153  | Bacteria | Tenericutes     | Mollicutes       | Anaeroplasmatales  | Anaeroplasmataceae      | Anaeroplasma        |              |
| OTU_414  | Bacteria | WPS-2           |                  |                    |                         |                     |              |
| OTU_1182 | Bacteria | WPS-2           |                  |                    |                         |                     |              |
| OTU_1298 | Bacteria |                 |                  |                    |                         |                     |              |
| OTU_682  | Bacteria |                 |                  |                    |                         |                     |              |
| OTU_879  | Bacteria |                 |                  |                    |                         |                     |              |
| OTU_1095 | Bacteria |                 |                  |                    |                         |                     |              |
| OTU_463  | Bacteria |                 |                  |                    |                         |                     |              |
| OTU_468  | Bacteria |                 |                  |                    |                         |                     |              |

|          |          |
|----------|----------|
| OTU_413  | Bacteria |
| OTU_1232 | Bacteria |
| OTU_154  | Bacteria |
| OTU_900  | Bacteria |
| OTU_488  | Bacteria |
| OTU_837  | Bacteria |

Shared

| OTUs     | Kingdom  | Phylum         | Class               | Order             | Family                 | Genus             | Specie   |
|----------|----------|----------------|---------------------|-------------------|------------------------|-------------------|----------|
| OTU_16   | Bacteria | Proteobacteria | Alphaproteobacteria | Rhizobiales       | Phyllobacteriaceae     |                   |          |
| OTU_18   | Bacteria | Proteobacteria | Alphaproteobacteria | Rhodobacterales   | Rhodobacteraceae       | Anaerospora       |          |
| OTU_5    | Bacteria | Proteobacteria | Alphaproteobacteria | Rhodobacterales   | Rhodobacteraceae       | Octadecabacter    |          |
| OTU_511  | Bacteria | Proteobacteria | Alphaproteobacteria | Rhodobacterales   | Rhodobacteraceae       | Shimia            |          |
| OTU_249  | Bacteria | Proteobacteria | Alphaproteobacteria | Rhodobacterales   | Rhodobacteraceae       |                   |          |
| OTU_2    | Bacteria | Proteobacteria | Alphaproteobacteria | Rhodobacterales   | Rhodobacteraceae       |                   |          |
| OTU_11   | Bacteria | Proteobacteria | Alphaproteobacteria | Rhodobacterales   | Rhodobacteraceae       |                   |          |
| OTU_47   | Bacteria | Proteobacteria | Alphaproteobacteria | Rhodobacterales   | Rhodobacteraceae       |                   |          |
| OTU_78   | Bacteria | Proteobacteria | Alphaproteobacteria | Rhodobacterales   | Rhodobacteraceae       |                   |          |
| OTU_769  | Bacteria | Proteobacteria | Alphaproteobacteria | Rickettsiales     | mitochondria           |                   |          |
| OTU_182  | Bacteria | Proteobacteria | Betaproteobacteria  | Burkholderiales   | Alcaligenaceae         | Achromobacter     |          |
| OTU_9    | Bacteria | Proteobacteria | Gammaproteobacteria | [Marinicellales]  | [Marinicellaceae]      |                   |          |
| OTU_20   | Bacteria | Proteobacteria | Gammaproteobacteria | [Marinicellales]  | [Marinicellaceae]      |                   |          |
| OTU_3    | Bacteria | Proteobacteria | Gammaproteobacteria | Alteromonadales   | OM60                   |                   |          |
| OTU_7    | Bacteria | Proteobacteria | Gammaproteobacteria | Alteromonadales   | OM60                   |                   |          |
| OTU_32   | Bacteria | Proteobacteria | Gammaproteobacteria | Alteromonadales   |                        |                   |          |
| OTU_8    | Bacteria | Proteobacteria | Gammaproteobacteria | Enterobacteriales | Enterobacteriaceae     | Escherichia       | coli     |
| OTU_1167 | Bacteria | Proteobacteria | Gammaproteobacteria | Enterobacteriales | Enterobacteriaceae     |                   |          |
| OTU_30   | Bacteria | Proteobacteria | Gammaproteobacteria | Vibrionales       | Pseudoalteromonadaceae | Pseudoalteromonas |          |
| OTU_4    | Bacteria | Proteobacteria | Gammaproteobacteria | Vibrionales       | Vibrionaceae           | Photobacterium    | damselae |
| OTU_1    | Bacteria | Proteobacteria | Gammaproteobacteria | Vibrionales       | Vibrionaceae           | Vibrio            |          |
| OTU_1100 | Bacteria | Proteobacteria | Gammaproteobacteria | Vibrionales       | Vibrionaceae           | Vibrio            |          |
| OTU_23   | Bacteria | Proteobacteria | Gammaproteobacteria | Vibrionales       | Vibrionaceae           | Vibrio            |          |
| OTU_22   | Bacteria | Proteobacteria | Gammaproteobacteria | Vibrionales       | Vibrionaceae           | Vibrio            |          |
| OTU_61   | Bacteria | Proteobacteria | Gammaproteobacteria |                   |                        |                   |          |
| OTU_170  | Bacteria | Proteobacteria |                     |                   |                        |                   |          |
| OTU_103  | Bacteria | Proteobacteria |                     |                   |                        |                   |          |
| OTU_44   | Bacteria | Proteobacteria |                     |                   |                        |                   |          |
| OTU_87   | Bacteria | Bacteroidetes  | Bacteroidia         | Bacteroidales     |                        |                   |          |
| OTU_12   | Bacteria | Bacteroidetes  | Flavobacteriia      | Flavobacteriales  | Flavobacteriaceae      | Tenacibaculum     |          |
| OTU_6    | Bacteria | Bacteroidetes  | Flavobacteriia      | Flavobacteriales  | Flavobacteriaceae      |                   |          |
| OTU_35   | Bacteria | Bacteroidetes  | Flavobacteriia      | Flavobacteriales  | Flavobacteriaceae      |                   |          |
| OTU_42   | Bacteria | Bacteroidetes  | Flavobacteriia      | Flavobacteriales  | Flavobacteriaceae      |                   |          |
| OTU_49   | Bacteria | Bacteroidetes  | Flavobacteriia      | Flavobacteriales  | Flavobacteriaceae      |                   |          |

|          |              |                 |                  |                    |                     |               |
|----------|--------------|-----------------|------------------|--------------------|---------------------|---------------|
| OTU_29   | Bacteria     | Bacteroidetes   | Flavobacteriia   | Flavobacteriales   |                     |               |
| OTU_1062 | Bacteria     | Bacteroidetes   | Flavobacteriia   | Flavobacteriales   |                     |               |
| OTU_148  | Bacteria     | Bacteroidetes   | Flavobacteriia   | Flavobacteriales   |                     |               |
| OTU_33   | Bacteria     | Actinobacteria  | Acidimicrobiia   | Acidimicrobiales   | C111                |               |
| OTU_10   | Bacteria     | Actinobacteria  | Acidimicrobiia   | Acidimicrobiales   | koll13              |               |
| OTU_38   | Bacteria     | Actinobacteria  | Actinobacteria   | Actinomycetales    | Cellulomonadaceae   | Demequina     |
| OTU_917  | Bacteria     | Actinobacteria  | Actinobacteria   | Actinomycetales    | Cellulomonadaceae   | Demequina     |
| OTU_85   | Bacteria     | Firmicutes      | Bacilli          | Bacillales         |                     |               |
| OTU_379  | Bacteria     | Firmicutes      | Bacilli          | Lactobacillales    | Lactobacillaceae    | Lactobacillus |
| OTU_936  | Bacteria     | Firmicutes      | Clostridia       | Clostridiales      | Ruminococcaceae     | Oscillospira  |
| OTU_1018 | Bacteria     | Firmicutes      | Clostridia       | Clostridiales      |                     |               |
| OTU_28   | Bacteria     | Verrucomicrobia | Verrucomicrobiae | Verrucomicrobiales | Verrucomicrobiaceae | Rubritalea    |
| OTU_94   | Bacteria     | Verrucomicrobia | Verrucomicrobiae | Verrucomicrobiales | Verrucomicrobiaceae |               |
| OTU_46   | Bacteria     | Verrucomicrobia | Verrucomicrobiae | Verrucomicrobiales | Verrucomicrobiaceae |               |
| OTU_114  | Bacteria     |                 |                  |                    |                     |               |
| OTU_111  | Bacteria     |                 |                  |                    |                     |               |
| OTU_84   | Bacteria     |                 |                  |                    |                     |               |
| OTU_25   | Bacteria     |                 |                  |                    |                     |               |
| OTU_634  | Unclassified |                 |                  |                    |                     |               |
| OTU_98   | Bacteria     |                 |                  |                    |                     |               |
| OTU_457  | Bacteria     |                 |                  |                    |                     |               |
| OTU_88   | Bacteria     |                 |                  |                    |                     |               |
| OTU_101  | Bacteria     |                 |                  |                    |                     |               |
| OTU_192  | Bacteria     |                 |                  |                    |                     |               |
| OTU_118  | Bacteria     |                 |                  |                    |                     |               |
| OTU_145  | Bacteria     |                 |                  |                    |                     |               |
