# Supplementary material for: Exploring the Impact of the Biofloc Rearing System and an Oral WSSV Challenge on the Intestinal Bacteriome of Litopenaeus vannamei
Source: MDPI journal article supplement (doi:10.3390/microorganisms6030083), 2018-08-08
Supplement: s1 [file s1]

**Table S1**

| <b>Total ammonia<br/>nitrogen</b> (mg. L <sup>-1</sup> ) | <b>Nitrite</b><br>(N-NO <sub>2</sub> mg. L <sup>-1</sup> ) | <b>Alkalinity</b><br>(CaCO <sub>3</sub> mg. L <sup>-1</sup> ) | <b>Nitrate</b><br>(mg. L <sup>-1</sup> ) | <b>pH</b> | <b>Total suspended<br/>solids</b> (mg. L <sup>-1</sup> ) |
|----------------------------------------------------------|------------------------------------------------------------|---------------------------------------------------------------|------------------------------------------|-----------|----------------------------------------------------------|
| 0.82                                                     | 0.72                                                       | 176                                                           | 62                                       | 8.41      | 427                                                      |
